---

# A U-NET MODEL OF LOCAL BRAIN-AGE

---

Sebastian G. Popescu<sup>1,2\*</sup>, Ben Glocker<sup>1</sup>, David J. Sharp<sup>2,3</sup>, and James H. Cole<sup>4,5</sup>

<sup>1</sup>Biomedical Image Analysis Group, Imperial College London

<sup>2</sup>Computational, Cognitive & Clinical Neuroimaging Laboratory, Imperial College London

<sup>3</sup>Care Research & Technology Centre, UK Dementia Research Institute

<sup>4</sup>Centre for Medical Image Computing, University College London

<sup>5</sup>Dementia Research Centre, University College London

## ABSTRACT

We propose a new framework for estimating neuroimaging-derived “brain-age” at a local level within the brain, using deep learning. The local approach, contrary to existing global methods, provides spatial anatomical information on patterns of brain ageing. We trained a U-Net model on brain MRI scans from  $n=3463$  healthy people to produce individualised 3D maps of brain-predicted age. Testing on  $n=692$  healthy people resulted in a median (across subject) mean absolute error (within subject) of 9.0 years. Performance was more accurate (MAE around 7 years) in the prefrontal cortex and periventricular areas. We also introduce a new voxelwise method to reduce the age-bias when predicting local brain-age “gaps”. To validate local brain-age predictions, we tested the model in people with mild cognitive impairment or dementia using data from OASIS3 ( $n=267$ ). Different local brain-age patterns were clearly evident between healthy controls and people with mild cognitive impairment or dementia, particularly in subcortical regions, with the accumbens, putamen, pallidum, hippocampus and amygdala. Comparing groups based on mean local brain-age over regions-of-interest resulted in large effects sizes, with Cohen’s  $d$  values  $>1.5$ , for example when comparing people with stable and progressive mild cognitive impairment.

**Keywords** Brain age · Deep learning · Dementia · U-Net · Voxelwise

## 1 Introduction

Brain ageing is associated with cognitive decline and an increased risk of neurodegenerative disease, though these effects vary greatly between individuals. Brain atrophy, often measured using structural MRI, is commonly seen in many neurological diseases [1, 2] and in normal ageing. Even hippocampal atrophy, which is often thought to be characteristic of Alzheimer’s disease can be seen in many other neurological and psychiatric conditions, respectively in normal ageing [3]. Evidently, both healthy ageing and dementia can affect the same brain regions [4]. This fact complicates research into the earliest stages of age-related neurodegenerative diseases, as determining what changes are ‘normal’ and what are pathological is challenging. Brain-Age offers a way of establishing if changes in the brain are abnormal or not for a given age. The difference between chronological age and “brain-predicted age” obtained from neuroimaging data has been provided insights into the relationship between brain ageing and diseases, and may be a useful biomarker for predicting clinical outcomes [5, 6, 7]. For example, in Alzheimer’s Disease (AD), patients have previously been shown to have older-appearing brains, and that individuals with mild cognitive impairment (MCI) who had an older-appearing brain were increasingly likely to progress to dementia within three years [8, 9, 10, 11]. However, despite the large growing literature employing the brain-age paradigm [12, 13], current approaches tend to generate brain-age predictions at a global level, with a single value per brain image. While some efforts have been made to derive patterns of ‘feature importance’ or similar from brain-age models [14, 15, 16, 17], these patterns are at population-level, and do not apply to the individual.

**Localized Brain Predicted Age** Obtaining a finer grained picture of patterns of brain-ageing for a given brain disease is likely to provide several benefits. Firstly, neuroanatomical patterns should enable inferences to be made about mechanisms underlying the clinical manifestation of the disease. Secondly, better predictive discrimination

---

\*s.popescu16@imperial.ac.uk

21 between clinical groups should be possible, as different groups are likely to be associated with different spatial patterns  
22 of age-related brain changes, even in the case where ‘global’ brain-age differences are similar. Thirdly, the local  
23 individualised maps should enable fine-grain characterisation of brain changes over time, as disease progresses or in  
24 response to treatment. Finally, spatial patterns of brain-age could be used to discover clinically-relevant subgroups in a  
25 data-driven manner, for example using clustering techniques.

26 **Related work** Limited prior work on local predictions of brain-age are available. Of note, is the early work  
27 of Cherubini et al. [18], who used linear regression models with voxel-level features derived from voxel-based  
28 morphometry and diffusion-tensor imaging to demonstrate reasonable prediction results in a small sample of healthy  
29 people (n=140). This approach of using a separate linear regression model for each voxel is limited as it does not  
30 incorporate contextual information from neighbouring voxels, and is insensitive to non-linear relationships. Other  
31 studies have provided ‘patch’ level information on brain-age, subsequently averaging predictions across brain regions  
32 to arrive at a global-level prediction [19, 20]. In Bintsi et al. [20], the authors use a ResNet [21] for each 3D block,  
33 reporting MAE values between 2.16 and 4.19 depending on block origin. While these approaches are promising, the  
34 size of the patch limits spatial resolution which results in less insightful inference in clinical settings. For example,  
35 semantic dementia is associated with a relatively localised spatial pattern of atrophy, often the left anterior and middle  
36 temporal lobe [22, 23], which could be overlooked by brain-age prediction models that lack spatial resolution.

37 **Contributions** The goal of this work was to develop an accurate local brain-age model, by incorporating voxelwise  
38 information using recent developments in deep learning. U-Nets [24], which are typically used for tumor [25] or organ  
39 [26] segmentation, provide an excellent framework for voxelwise predictions, as their specific architecture enables the  
40 inclusion of contextual information into individual predictions. Here, we introduce a deep learning algorithm that is  
41 trained to predict localised brain-age, producing high-resolution maps of brain-predicted age differences (brain-PAD  
42 maps) covering the entire brain (see Figure 1). We hypothesised that brain-PAD would smoothly vary across regions  
43 of the brain, and in dementia patients we would see higher values in regions previously associated with AD-related  
44 atrophy. We provide an in-depth analysis of the structural differences seen in people with MCI and AD patients. We  
45 also examine the reliability of local brain-age predictions, both within and between scanners.

## 46 2 Methods

### 47 2.1 Participants

48 To train, test and validate our local brain-age model, we collated the following T1-weighted MRI brain scan datasets.  
49 Unless otherwise mentioned, studies were reviewed and approved by the local ethics committees. All participant data  
50 were from publicly accessible databases.

#### 51 2.1.1 Healthy datasets for training/testing

52 **Healthy training dataset** is composed of 2001 healthy individuals with a male/female ratio of 1016/985, with a  
53 mean age of  $36.95 \pm 18.12$ , aged 18-90 years. This dataset was itself an amalgam of 14 individual datasets, as used in  
54 our previous brain-age research [27].

55 **Dallas Lifespan Brain Study** (DLBS) is a major effort designed to understand the antecedents of preservation and  
56 decline of cognitive function at different stages of the adult lifespan, with a particular interest in the early stages of a  
57 healthy brain’s march towards Alzheimer Disease. For our purpose we have selected solely the T1-weighted MRI scans,  
58 totaling n=315 healthy participants aged 18-89 years.

59 **Cambridge Centre for Ageing and Neuroscience** (Cam-CAN) neuroimaging dataset is part of larger project which  
60 is trying to use epidemiological, behavioural and neuroimaging data to understand how individuals can best retain  
61 cognitive abilities into old age. The dataset consists of n=652 T1-weighted MRI scans from participants aged 18-88  
62 years.

63 **Southwest University Adult Lifespan Dataset** (SALD) comprises a large cross-sectional sample (n = 494; age  
64 range = 19-80) undergoing a multi-modal (sMRI, rs-fMRI, and behavioral) neuroimaging. Only T1-weighted MRI  
65 were used here. The goals of the SALD are to give researchers the opportunity to map the structural and functional  
66 changes the human brain undergoes throughout adulthood and to replicate previous findings.

67 **Wayne State** The Wayne State longitudinal data set for the Brain Aging in Detroit Longitudinal Study, comprises 200  
68 healthy individuals, with n=302 total anatomical scans across two waves of data collection. All the participants were

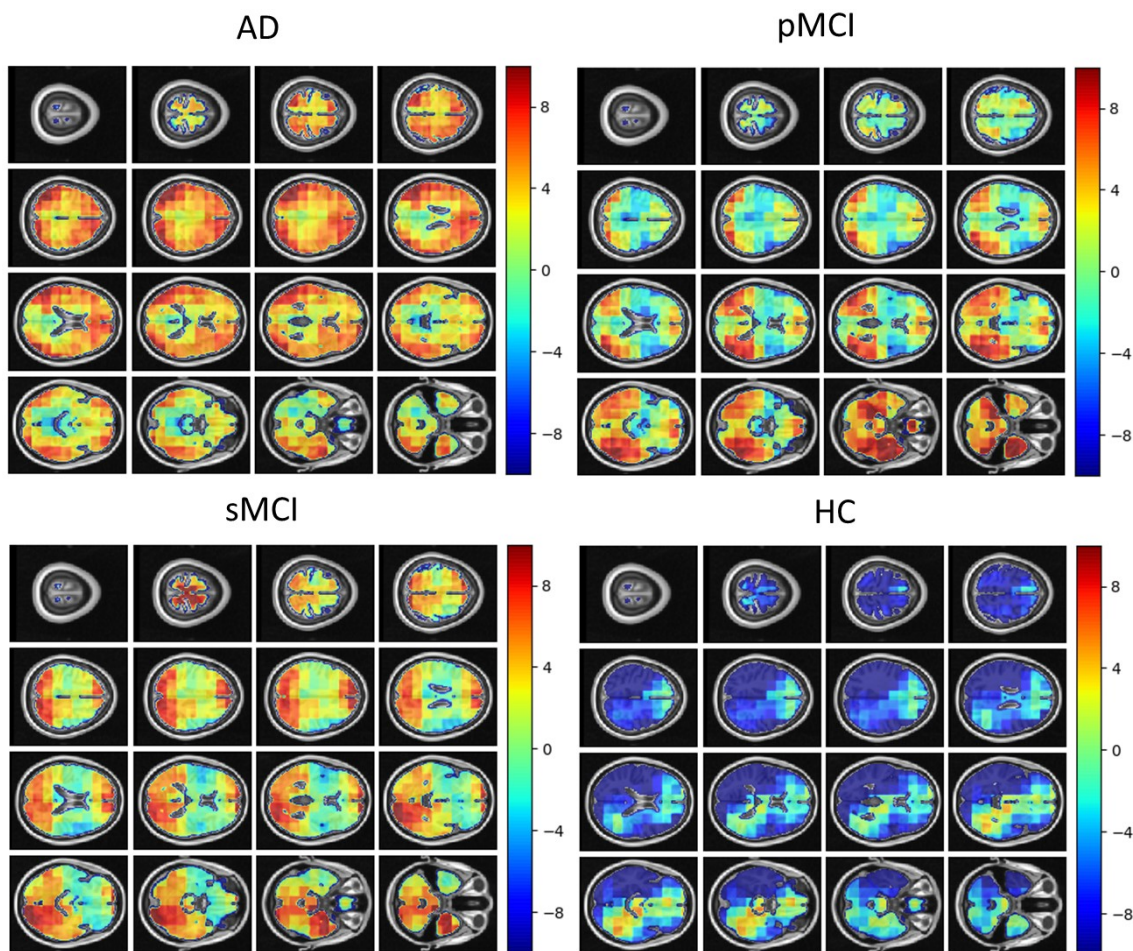

Figure 1: Local brain-PAD maps for randomly sampled subjects from clinical groups in cross-sectional OASIS3 dataset. Positive values indicate an increased pattern of local volume differences compared to healthy ageing patterns at the respective age. HC = Healthy Controls, pMCI = progressive MCI, sMCI = stable MCI, AD = Alzheimer's Disease.

69 screened by the local research centres to be free from neurological or psychiatric disorders according to well established  
70 protocols. All of the neuroimaging data were acquired either at 1.5T or 3T using standard T1-weighted sequences.

71 **Within-scanner reliability dataset** Here we used data from the Imperial College London project, Study Of Relia-  
72 bility of MRI (STORM). The study comprises of 20 subjects with a male-female ratio of 12/8, with a mean age at the  
73 first scan undertaken of  $34.05 \pm 8.71$ . The participants were scanned for the second time at an average distance of  
74  $28.35 \pm 1.09$  days. All participants were free from any neurological or psychiatric disorders. Data were acquired using  
75 a Siemens Verio 3T scanner.

76 **Scanner calibration dataset** 11 participants took place in this two-centre study, having a mean age at first scan of  
77  $30.88 \pm 6.16$  and with a male/female ration of 7/4. The two scanning sites were at Imperial College London, where a  
78 Siemens Verio 3T was used, whereas a Philips Ingenia 3T scanner was used at the Academic Medical Center Amsterdam.  
79 The average time interval between scans was of  $68.17 \pm 92.23$  days.

### 80 2.1.2 Dementia datasets for testing clinical suitability of Local brain-age

81 **OASIS3** is a retrospective compilation of data for >1000 participants that were collected across several ongoing  
82 projects through the WUSTL Knight ADRC over the course of 30 years. Participants include n=609 cognitively normal  
83 adults and n=489 individuals at with MCI or dementia ranging in age from 42-95 years. Using Clinical Dementia Rating

84 scale(CDR) scores, we classified participants as healthy control (HC), stable MCI, progressive MCI or AD, as detailed  
85 in Table 1. Follow-up CDR scores used to define MCI status were from at least 3 years after baseline assessments.

| Characteristics      | HC<br>(n=128) | sMCI<br>(n=29) | pMCI<br>(n=29) | AD<br>(n=78) |
|----------------------|---------------|----------------|----------------|--------------|
| Males/Females, n     | 70/58         | 15/14          | 18/11          | 33/45        |
| Age, mean (SD) years | 68.14 (9.40)  | 76.44 (6.81)   | 75.72 (7.68)   | 75.02 (8.90) |
| Age, range years     | 42.66-97.11   | 59.2-94.44     | 49.38-93.93    | 50.35-95.58  |
| Baseline CDR         | 0.0           | 0.5            | 0.5            | ≥ 1.0        |
| Follow-up CDR        | 0.0           | 0.5            | ≥ 1.0          | -            |

Table 1: Demographic characteristics for the OASIS3 dataset. CDR = Clinical Dementia Rating scale, HC = Healthy Controls, pMCI = progressive MCI, sMCI = stable MCI, AD = Alzheimer’s Disease.

## 86 2.2 Data pre-processing

87 All T1-weighted brain MRI scans were pre-processed using the Statistical Parametric Mapping (SPM12) software  
88 package (<https://www.fil.ion.ucl.ac.uk/spm/software/spm12/>). This entailed tissue segmentation into grey  
89 matter (GM) and white matter (WM), followed by a nonlinear registration procedure using the DARTEL algorithm [28]  
90 to the Montreal Neurological Institute 152 (MNI152) space, subsequently followed by resampling to  $1.5mm^3$  with a  
91 4mm smoothing kernel.

## 92 2.3 Statistical analysis

93 **Standard effect sizes** To assess the magnitude of differences in local brain-PAD values between different groups, we  
94 used the standardised effect size Cohen’s  $d$ :

$$d = \frac{m_1 - m_2}{\sqrt{\frac{(count_1 - 1) * var_1 + (count_2 - 1) * var_2}{count_1 + count_2 - 2}}} \quad (1)$$

95 where  $m_k$  is the mean,  $var_k$  represents the variance, whereas  $count_k$  defines the number of subjects within group  $k$ . In  
96 all subsequent analysis using Cohen’s  $d$  we perform the analysis at voxel-level between Brain-PAD scores from two  
97 different groups.

98 **Intraclass Correlation Coefficient** The intraclass correlation coefficient (ICC) is used to test the reproducibility of a  
99 certain quantitative measurement made by a specified number of observers which rate the same subject. The original  
100 formula is given as follows:

$$r = \frac{1}{Ns^2} \sum_{n=1}^N (x_{n,1} - \tilde{x})(x_{n,2} - \tilde{x}) \quad (2)$$

101 where  $\tilde{x} = \frac{1}{2N} \sum_{n=1}^N (x_{n,1} + x_{n,2})$  and  $s^2 = \frac{1}{2N} \{ \sum_{n=1}^N (x_{n,1} - \tilde{x})^2 + \sum_{n=1}^N (x_{n,2} - \tilde{x})^2 \}$

102 Here, we used ICC[2,1] as defined by Shrout and Fleiss [29]. The interval of values ranges from  $[-1, 1]$  with values  
103 closer to 1 denoting that the observers (i.e., MRI scans or scanners) agree with each other.

## 104 2.4 Local “Brain-age” Prediction

105 We used a fully convolutional neural network (CNN) inspired by the U-Net architecture introduced in Ronneberger  
106 et al. [24]. Our network architecture is illustrated in Figure 2. Input images were the output from SPM12 pre-  
107 processing, representing voxelwise volume of GM and WM. These images were split into overlapping 3-dimensional  
108 blocks of size 52 voxels isotropic. The convolutional layers in our network used an isotropic 3x3x3 filter, convolved  
109 over the input image after which element-wise multiplication with the filter weights and subsequent summation was  
110 performed at each location. Subsequently, to allow for non-linear modelling, we passed the obtained values through an  
111 “activation function”; we used a LeakyReLU with alpha=0.2.  $LeakyReLU(\alpha)$  are defined by the following equation  
112  $LeakyReLU(x) = \max(x, 0) + \min(x * \alpha, 0)$ , thus allowing a small, non-zero gradient when the unit is not active.



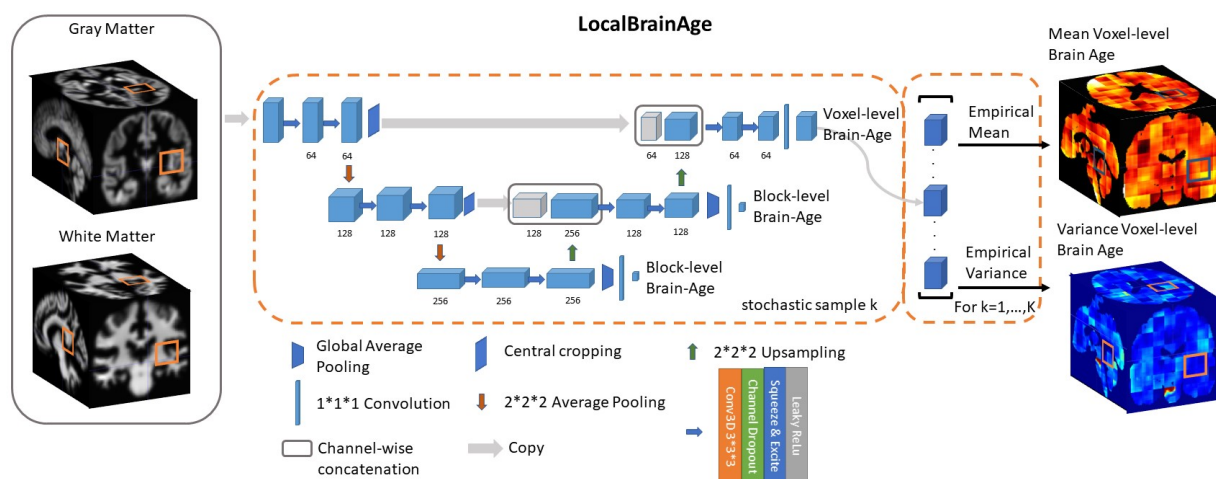

Figure 2: U-Net architecture for voxel-level brain-age prediction. Raw T1 scans are pre-processed through the DARTEL pipeline in SPM12, obtaining modulated gray and white matter segmentations registered to MNI152 template. Additional auxiliary block-level brain-age loss functions are added at each level of the U-Net to facilitate training.

113 The convolution operation is also controlled by its stride, which is how many pixels/voxels are skipped after every  
 114 element-wise weight multiplication and summation. Downsampling increases the effective field of view or “receptive  
 115 field” of layers higher in the hierarchy. We set the stride equal to 1 unless mentioned otherwise.

116 For the downsampling part of the U-Net we used at each scale two consecutive 3D 3x3x3 filter kernels with an initial  
 117 number of channels = 64, which get multiplied by 2 as we progress down the downsampling path. For downsampling  
 118 we used 2x2x2 average pooling.

119 For the upsampling part of the U-Net we inverted the downsampling architecture, with the downsampling layers being  
 120 replaced by 2x2x2 upsampling layers. At each convolution we used a squeeze-and-excite unit. Squeeze & Excite  
 121 networks were introduced in Hu et al. [30] and can be viewed as computationally less intensive method of performing  
 122 attention over the channels of a given feature block.

123 Besides the voxel-level mean absolute error cost function on the output layer we introduced two additional cost functions  
 124 at the two other scales of the architecture. We applied global average pooling followed by a dense layer to predict  
 125 brain-age at block-level. During training, we observed that the addition of these auxiliary loss functions helped stabilise  
 126 the learning process.

## 127 2.5 Removing bias in brain age at voxel level

128 Subtracting chronological age from estimated brain age provides a measure of the difference between an individual’s  
 129 predicted and chronological age, also known as the brain-age ‘gap’, brain-predicted age difference (brain-PAD) or  
 130 brain-age ‘delta’. A so-called ‘regression dilution’ has been commonly observed in brain-age prediction algorithms,  
 131 caused by noise in the neuroimaging features leading to a greater under- or over-estimate of age, the further away a  
 132 sample is from the training set mean age. In other words, the under-estimation of brain-predicted age for older subjects  
 133 and over-estimation for younger subjects. Two main classes of approaches to fixing this problem have been reported:

$$\Delta = \alpha * Age + \beta \quad (3)$$

134 where  $\Delta$  is the brain-age delta of a group of subjects from an external dataset that is used specifically for adjusting the  
 135 bias.  $\alpha$  and  $\beta$  are the parameters of a linear regression with the covariate *Age* representing chronological age.

136 Then, to obtain the bias-adjusted age we have the following equation:

$$\Delta_{adjusted} = \Delta - \alpha * Age + \beta \quad (4)$$

137 Another approach involves using the brain-predicted age in the linear regression. de Lange and Cole [31] showed that  
138 using either formulation results in the same statistical outcome.

139 Our approach involved using an independent dataset of participants, not present in either the training or testing set,  
140 which was stratified into different age bins, with an interval of 5 years. We then averaged their voxel-level brain-age  
141 delta values to obtain a 3D heatmap to use for de-biasing. We show additional results using the first approach in the  
142 supplementary material.

### 143 3 Results

#### 144 3.1 Model performance in independent healthy test datasets

145 We tested the local brain-age model on healthy participants combined from the OASIS3 (n = 128), AIBL (n = 83)  
146 and Wayne State (n = 200) datasets. When first averaging the local MAE values within each individual to derive  
147 participant-level MAEs, the median MAE across subjects was 9.751 years (Figure 3c). The MAE of the model varied in  
148 different brain regions. We observed lower MAE values were observed locally in the prefrontal cortex and subcortical  
149 regions and higher MAE in the occipital lobe, cerebellum and brainstem (Figure 3b).

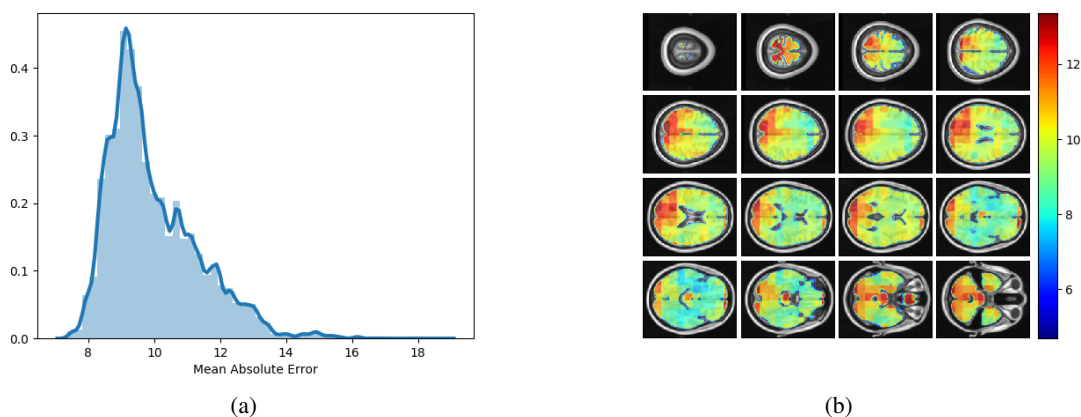

Figure 3: **Left** : Histogram of unadjusted, averaged MAE values across subjects for each voxel. **Right**: Axial slices showing the spatial heterogeneity in averaged across subjects MAE values.

#### 150 3.2 Reliability of local brain-age

151 Using local brain-age values for both the test-retest dataset and between-scanner dataset, ICC was calculated per voxel.  
152 For the test-retest dataset, the vast majority of voxels were  $ICC < 0.90$ , with a median of  $ICC = 0.98$ . This indicated very  
153 high test-retest, or within-scanner, reliability, of local brain-age predictions. We observed comparatively lower ICC  
154 values at the extremities of the brain, evident in Figure 4b. This could potential be attributed to residual misregistration  
155 or partial volume effects. For the between-scanner analysis the reliability was lower, with median voxel-level  $ICC =$   
156  $0.623$ . Interestingly, the pattern of ICC varied across the brain, with higher values observed in the prefrontal cortex and  
157 lower values in more inferior regions, particularly the brainstem and cerebellum (Figure 4d).

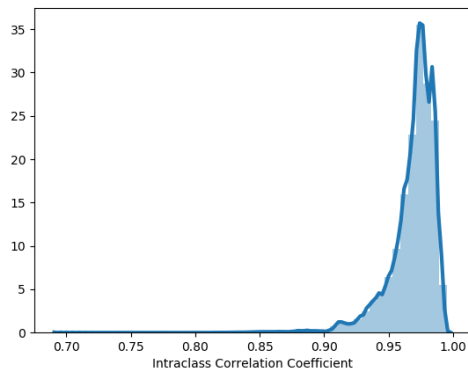

(a) Within-scanner variability

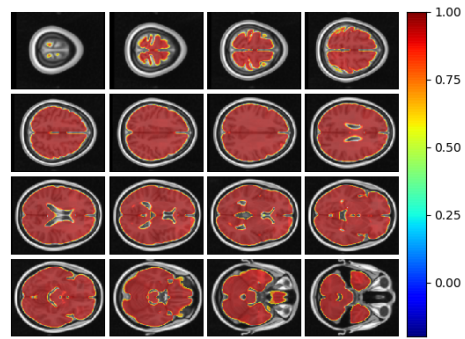

(b) Within-scanner variability

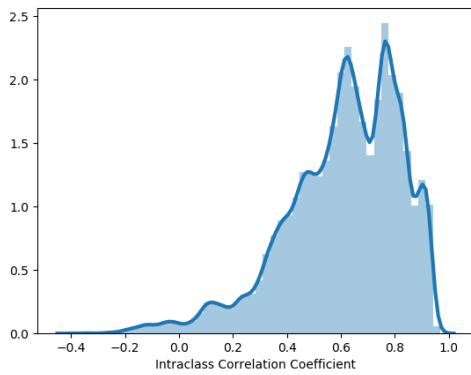

(c) Between-scanner variability

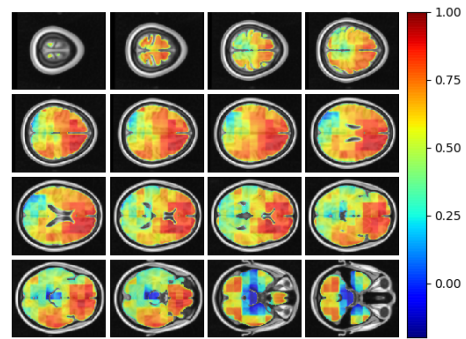

(d) Between-scanner variability

Figure 4: **Upper left:** Histogram of Intra-class Correlation Coefficients computed at voxel-level on STORM dataset. Values above 0.9 indicate strong agreements. **Upper right:** ICC values at different views on the axial plane on test-retest (i.e., within-scanner) dataset (n=20). **Bottom left:** Histogram of Intra-class Correlation Coefficients computed at voxel-level on between-scanner reliability dataset (n=11, Siemens and Philips scanners). **Bottom right:** ICC values at different axial slices from the between-scanner dataset.

### 158 3.3 Differences in local brain-age patterns between healthy controls, patients with mild cognitive impairment 159 and dementia

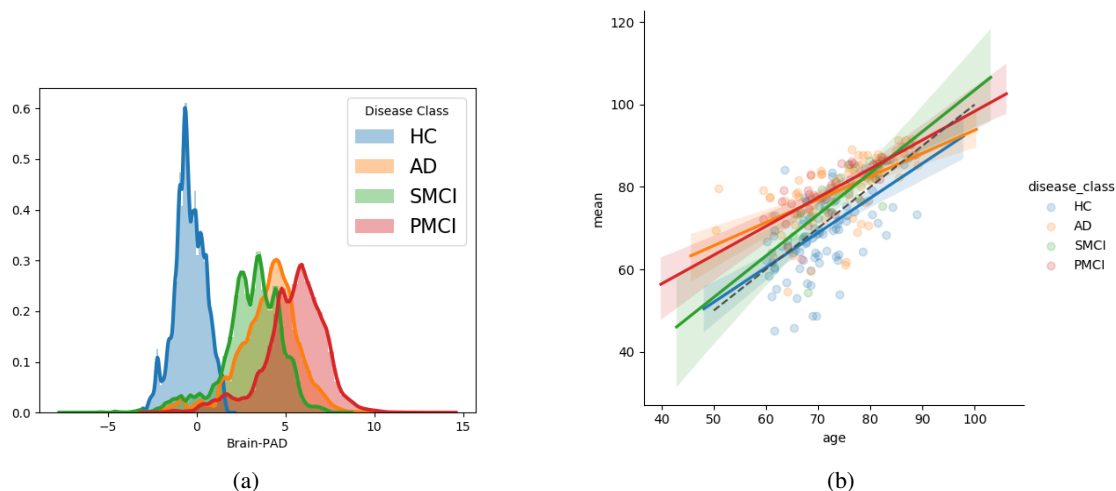

Figure 5: **Left - Voxel-level** : Histogram at voxel-level of Brain-PAD scores of certain clinical groups from OASIS3. Brain-PAD after applying the bias-adjustment scheme is calculated for every voxel and then aggregated to the mean across all subjects. Histograms in the plot are composed of the mean Brain-PAD values for all voxels in the brain; **Right - Global-level** : Adjusted predictions averaged across voxels for each subject; HC = Healthy controls, sMCI= stable MCI, pMCI = progressive MCI, AD = Alzheimer’s disease

160 We examined patterns of local brain-age algorithm in the context of MCI and dementia using the cross-sectional  
161 OASIS3 dataset. Firstly, we investigated if the global level brain-predicted age corresponds to previously reported  
162 differences from models that direct predict global brain age. We averaged local brain-age (after bias correction) across  
163 voxels per individual to generate a global brain age and then calculate Brain-PAD. The median Brain-PAD values were:  
164 0.95 years for healthy controls, 2.83 years for stable MCI (sMCI), respectively 4.94 years for progressive MCI (pMCI)  
165 and 4.63 years for AD patients.

| Disease Groups | HC     | sMCI    | pMCI    | AD      |
|----------------|--------|---------|---------|---------|
| HC             | -      | <<0.001 | <<0.001 | <<0.001 |
| sMCI           | 0.0369 | -       | <<0.001 | <<0.001 |
| pMCI           | 0.0007 | 0.1611  | -       | <<0.001 |
| AD             | 0.0004 | 0.4141  | 0.3714  | -       |

Table 2: Independent t-test results between disease groups in OASIS3 for global brain-age prediction in lower triangular part of the matrix. Paired t-test results between disease groups in OASIS3 for voxel-level brain-age prediction in upper triangular part of the matrix.

166 To assess the significance of group differences we performed an independent two-sample t-test, with differences between  
167 cognitively impaired groups and healthy controls being significant (HC-AD p-value=0.0004; HC-sMCI p-value=0.0369;  
168 HC-pMCI=0.0007). Between groups with varying degrees of cognitive impairment, the lowest p-value was reported  
169 between sMCI-pMCI at 0.1611, whereas the other two combinations were also insignificant (AD-sMCI p-value=0.4141;  
170 AD-pMCI=0.3714). In comparison, we note that our proposed algorithm is capable to estimate a positive median local  
171 brain-PAD score for sMCI (3.266), thereby managing to differentiate between sMCI and HC. On the OASIS3 dataset,  
172 we get an estimated median local brain-PAD score of 7.7 years (5.663) for pMCI, respectively of 4.229 for AD (Figure  
173 5). By comparing brain-age difference locally, differing patterns between between all disease groups are evident (Table  
174 2).

175 From Figure 6 we can observe that the most striking differences are in the temporal lobe and subcortical regions when  
176 comparing AD to HC, which is in line with literature. For a more in-depth look at differences between disease groups,  
177 we expand the analysis to subcortical ROIs. The accumbens, putamen, pallidum and hippocampus were the most



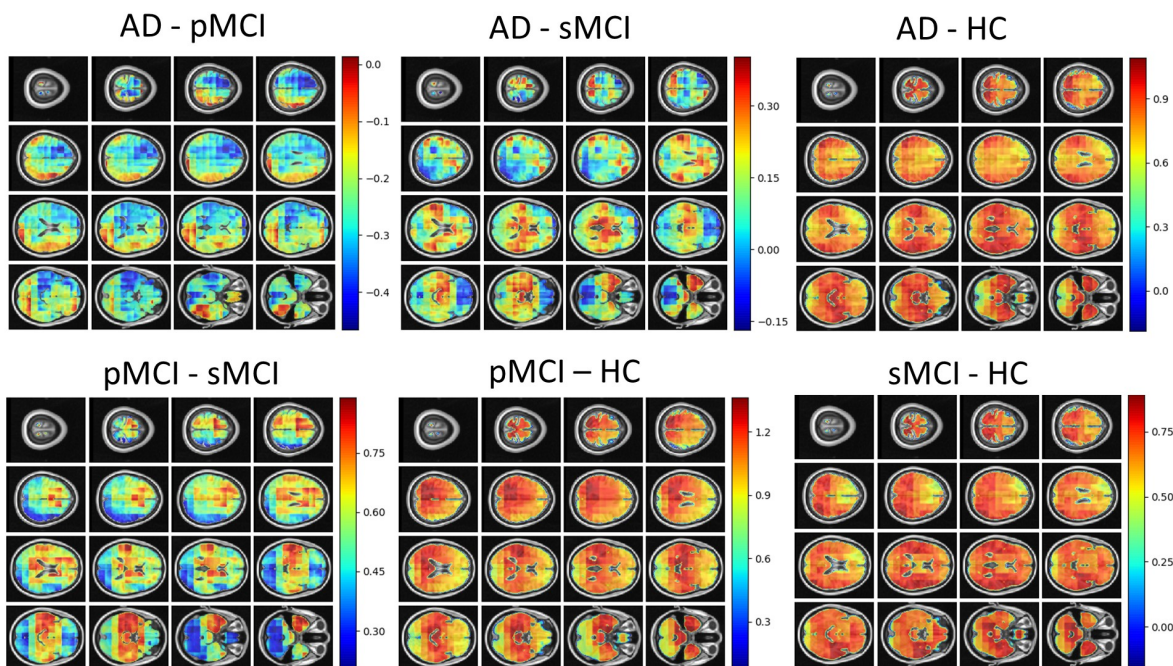

Figure 6: Cohen’s  $d$  maps for different combinations of clinical groups in cross-sectional OASIS3. Positive values indicate a positive effect for the first group. HC=Healthy Controls; pMCI = progressive MCI; sMCI = stable MCI; AD=Alzheimer’s Disease.

| Subcortical ROI name | AD vs. HC Left | pMCI vs sMCI Left | AD vs. HC Right | pMCI vs sMCI Right |
|----------------------|----------------|-------------------|-----------------|--------------------|
| Brain-Stem           | 1.82           | 0.53              | -               | -                  |
| Amygdala             | 4.41           | 1.43              | 4.00            | 1.57               |
| Caudate              | 4.69           | 1.69              | 4.41            | 1.47               |
| Cerebral Cortex      | 1.98           | 0.81              | 1.93            | 0.89               |
| Cerebral WM          | 5.29           | 2.48              | 4.32            | 2.56               |
| Hippocampus          | 4.95           | 1.72              | 5.77            | 2.65               |
| Lateral Vent         | 0.30           | 0.11              | 0.27            | 0.09               |
| Pallidum             | 11.80          | 5.91              | 13.31           | 8.31               |
| Putamen              | 15.59          | 6.82              | 10.66           | 5.13               |
| Thalamus             | 4.02           | 1.60              | 4.80            | 2.11               |
| Accumbens            | 30.02          | 9.60              | 31.00           | 9.80               |

Table 3: Cohen’s  $d$  values for different subcortical ROIs from the Oxford-Harvard atlas. Higher values indicate a positive effect size for the first disease group specified. Values of above absolute value 0.2 are regarded as having a significant effect.

178 discriminative ROIs in terms of Cohen’s  $d$  scores both for separating AD from HC and sMCI from pMCI (Table 3).  
 179 We also provide histograms of the local brain-PAD scores for each disease group per subcortical ROI to get a better  
 180 intuition being the Cohen’s  $d$  scores (Figure 7). We notice that the high Cohen’s  $d$  scores for the accumbens are due to  
 181 the low variance in predictions occurring in that region.

## 182 4 Discussion

183 In this paper, we introduced an algorithm capable of reliably estimating neuroimaging derived age at a high resolution  
 184 compared to existing models in literature. Having obtained a voxel-level distribution of mean absolute error values  
 185 centred at 9.0 years, the accuracy of our proposed model is behind the current state of the art for global-level brain age  
 186 prediction [32], which currently gravitates towards 3.0 years, or even in comparison with patch-level results [20] that  
 187 are in an interval between 2.5 and 4.0 years, albeit using large blocks. Nevertheless, we provide results on the testing set

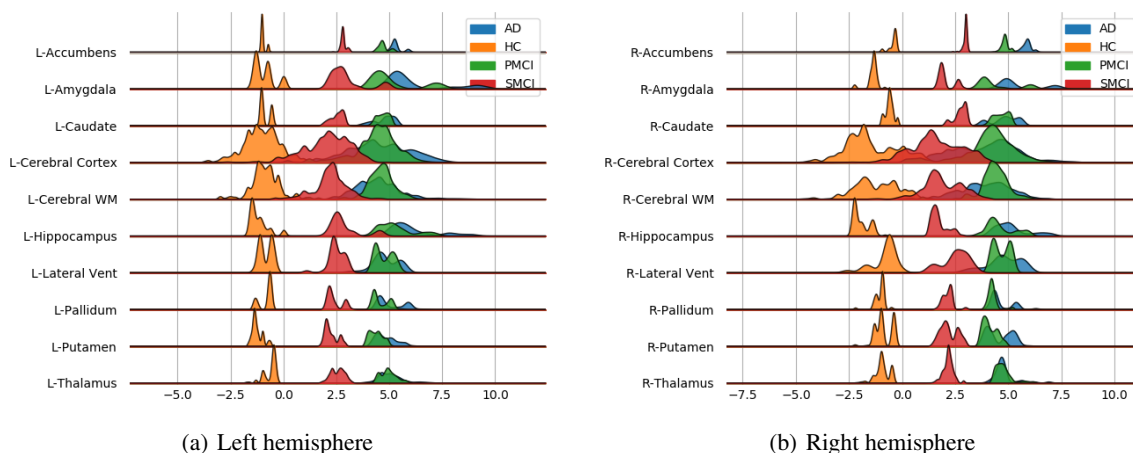

Figure 7: Subcortical ROI-based difference in voxel level Brain-PAD scores averaged across subjects from clinical groups from OASIS3. X axis registers Brain-PAD values within the given ROI; HC = Healthy controls, sMCI= stable MCI, pMCI = progressive MCI, AD = Alzheimer's disease

188 with no post-hoc bias-adjustment. Furthermore, it is worth mentioning that our model is assessed on a multi-site testing  
189 set with a flat chronological age histogram spanning ages between 18 and 90 as opposed to an age interval between 45  
190 and 90, which is usually seen in papers assessed on UK Biobank [32, 20].

191 As biomarker of brain health, brain-age models may have clinical utility. To this end, we assessed the usefulness of  
192 local brain-age in a clinically-relevant setting, by exploring brain-ageing in dementia at a finer-grained scale than  
193 previous brain-age research. [33] highlights that in the early stages of AD, accelerated degeneration occurs in the medial  
194 temporal lobe (MTL), eventually affecting the amygdala, entorhinal and parahippocampal cortices [34, 35, 36]. In the  
195 case of discerning between pMCI versus sMCI, the authors reported that the amygdala and the inferior lateral ventricle  
196 were the most discriminative. Taking into account the Cohen's  $d$  values between local brain-PAD values within ROIs  
197 from the Oxford-Harvard atlas, we have observed that the accumbens, putamen, pallidum, hippocampus and amygdala  
198 were the most discriminative of the subcortical regions. Our findings are in line with previous work. For example, [37]  
199 showed that the highest discriminative power between AD and HC was present in the volume of the amygdala, with  
200 other MTL regions such as the hippocampus also highly discriminative, whereas [38] has observed a prominent loss of  
201 GM in the putamen for AD. As a prospective clinical application, the ROI-based BrainPAD values can be used by an  
202 additional classifier to distinguish between pMCI and sMCI. Results on cortical ROIs are provided in the supplementary  
203 material.

204 Previous work involving brain-age and dementia have obtained "brain-AGE" scores of -0.2 for sMCI, 6.2 for pMCI and  
205 6.7 for AD on the ADNI dataset [9]. Our results are mostly in line with these previous findings, with the exception that  
206 for sMCI we obtained a positive median value of 2.83 years. However, we did not find any studies using OASIS3, so  
207 for our results we obtain a higher median local brain-PAD for pMCI (4.94 years) than for AD (4.63 years).

208 Biomarkers derived from neuroimaging have potential to provide clinically-relevant information about dementia and  
209 related conditions. While previous studies has reported standardised effect sizes from global brain-age, we used atlas  
210 ROIs to summarise regional values of local brain-PAD and generate Cohen's  $d$  values from pairwise group comparisons.  
211 Using conventional hippocampal volumetric measures, Henneman et al. [39] reported baseline effect size of 0.73  
212 when comparing controls and MCI groups, and 0.33 when comparing MCI and AD patients. With our local brain-age  
213 framework, the control-MCI effect size for the hippocampus (average bilaterally) was  $d = 5.45$  and the MCI-AD effect  
214 size was  $d = 0.48$ . Using voxel-based morphometry, [40] generated Cohen's  $d$  values for the hippocampus ( $d = 0.6$ ) and  
215 amygdala ( $d = 0.45$ ), when comparing sMCI and pMCI patients. Here, our local brain-age framework resulted in  $d =$   
216 2.18 for the hippocampus and  $d = 1.5$  for the bilateral amygdala. This suggests that use of the brain-age paradigm to  
217 capture local age-related changes, relative to a healthy ageing model, could increase statistical power in experimental  
218 research and clinical trials, relative to conventional imaging biomarkers.

219 Our proposed U-Net local brain-age framework has some strengths and weaknesses to consider. Our model showed  
220 excellent test-retest reliability, giving confidence that the model could be applied longitudinally to assess individual  
221 patterns of brain-ageing changes. However, the between-scanner reliability was moderate, similar to our previous work  
222 using deep learning to predict brain age [27]. In the latter work, brain-age prediction was performed directly on raw

223 MRI scans, hence the deep learning model is picking up on site artefacts. One might expect that after preprocessing raw  
224 structural MRI scans through DARTEL these site effects might be partially eliminated. However, this is not the case as  
225 previous research [41] has demonstrated. Consequently, one drawback of the current algorithm is the requirement to  
226 have a healthy population from a given site, as site or scanner effects may result in the local brain-PAD distribution not  
227 being centred at zero. Future work should explore scanner harmonisation techniques to remove scanner effects [42].

228 In terms of model accuracy, local brain-age was not able to match its global-level models. However, this is to be  
229 expected as each predicted voxel has a field-of-view of  $12^3$  voxels, each of  $1.5mm^3$ , providing far less information than  
230 global models receive. Interestingly, regions such as the occipital lobe, brainstem and cerebellum has poorer accuracy  
231 than other brain areas. This may be due to local image noise or artefacts in the MRI data, more complex patterns of  
232 ageing in these areas not detected by our model, or potentially a lack of pronounced age-related changes to tissue  
233 volume in these regions.

234 Our results at testing time do not take into consideration bias correction as our proposed bias adjustment technique uses  
235 the actual chronological age for removing age-related bias, in opposition to the predicted age which is often used for  
236 improving predictive results. We note that we have attempted a bias-adjustment scheme reliant on a mass univariate  
237 linear regression which takes the predicted age for each voxel in part, but the results were only marginally improved as  
238 the voxel-level brain age delta distribution is noisy. Examples of some distributions and the fitted linear regressions  
239 are given in the supplementary material. Nevertheless, our bias adjustment technique is adequate for eliminating age  
240 related biases when the end goal is group comparison as opposed to predictive accuracy [31]. We noticed that age  
241 related negative correlations are eliminated at global level (taking the average over debiased voxel-level predictions).  
242 However upon closer inspection at voxel-level, there are slight issues for subjects between 18 and 55 years, with certain  
243 voxels exhibiting high brain age delta values (see supplementary materials). For subjects above 55 years, our bias  
244 adjustment technique is capable to eliminate age-related bias, thus enabling accurate statistical inference for clinical  
245 datasets involving older subjects.

246 By using a U-Net trained with the ground truth voxel-level regression objective given by a three-dimensional block  
247 filled with the chronological age, we encourage the network to emphasize the context encoded in its lower layers. As  
248 the individual voxel location we are aiming to obtain a prediction for is not necessarily related to the imposed ground  
249 truth output, the U-Net architecture is biased towards using the context information. Hence, in the worst case scenario  
250 where no voxel-level relationship is learned, the true resolution of our voxel-level predictions is actually blocks of  $12^3$   
251 voxels. While this means that our resolution is not necessarily at the voxel-level,  $12^3$  voxels is still substantially higher  
252 resolution compared to existing models in literature. In the 3D block approach of Binti et al. [20], blocks are much  
253 larger,  $64^3$  voxels. Hence, any block-level age prediction will be biased towards the global-level brain age prediction as  
254 the blocks include a substantial portion of the overall brain. Moreover, in splitting the whole brain into blocks, naturally  
255 some blocks will include non-brain tissue or empty space, which will naturally reduce the amount of discriminative  
256 information present there, reducing the validity of results for regions within the respective block.

257 This paradigm can not only be applied to local-brain age prediction, but the final output can be composed of any other  
258 biomarker, such as polygenic risk score, MMSE scores or blood sample biomarkers. Whereas predicting deviations  
259 from normal ageing is well-motivated as one cannot easily evaluate the positive or negative accelerated ageing of the  
260 brain from a structural scan, all the aforementioned biomarkers can be easily obtained in a clinical setting, then the  
261 motivation stems mostly from gaining a mechanistic understanding of the relation between for example a structural  
262 MRI scan and the respective biomarker value. One potential research avenue for local brain-age is in disease subtyping,  
263 where one can use the local brain-age heatmaps to obtain clusters of different facets of accelerated brain ageing in a  
264 certain disease. Furthermore, another interest might be in exploring local brain-age's suitability in longitudinal datasets.

265 VBM constitutes an alternative to LocalBrainAge, being the de facto method to quantitatively assess differences between  
266 groups at voxel-level [43]. A common criticism of brain-age prediction in general is whether it brings added value  
267 compared to a standard VBM pipeline. We consider the two approaches to be in essence equivalent. In VBM pipelines,  
268 one assesses the statistical differences between a control group and a diseased group. BrainPAD implicitly measures  
269 this deviation of the diseases group from what constitutes a normative pattern of ageing, by placing the subject on a  
270 density of what a normative pattern constitutes for a given age. We leave for further work the comparison between  
271 VBM and LocalBrainAge.

272 **Conclusion** We have introduced a new algorithm that is capable of reliably estimating brain-age locally, providing  
273 high resolution maps revealing information on spatial patterns of age-related changes to brain volume. We were able  
274 to demonstrate the potential of this approach in clinical settings by mapping differences in local brain-PAD scores at  
275 patients with cognitive impairment and dementia.

276 **Data and code availability statement** The data used in these experiments are available on applica-  
277 tion to the relevant studies. The code used is available at [https://github.com/SebastianPopescu/](https://github.com/SebastianPopescu/U-NET-for-LocalBrainAge-prediction)  
278 [U-NET-for-LocalBrainAge-prediction](https://github.com/SebastianPopescu/U-NET-for-LocalBrainAge-prediction) alongside the pre-trained models.

## 279 References

- 280 [1] Abhijit Chaudhuri. Multiple sclerosis is primarily a neurodegenerative disease. *Journal of neural transmission*,  
281 120(10):1463–1466, 2013.
- 282 [2] Valentina Lorenzetti, Nicholas B Allen, Alex Fornito, and Murat Yücel. Structural brain abnormalities in major  
283 depressive disorder: a selective review of recent mri studies. *Journal of affective disorders*, 117(1-2):1–17, 2009.
- 284 [3] MP Laakso, Kaarina Partanen, P Riekkinen, Maarit Lehtovirta, E-L Helkala, Merja Hallikainen, Tuomo Hanninen,  
285 Paula Vainio, and Hilka Soinen. Hippocampal volumes in alzheimer’s disease, parkinson’s disease with and  
286 without dementia, and in vascular dementia an mri study. *Neurology*, 46(3):678–681, 1996.
- 287 [4] Samuel N Lockhart and Charles DeCarli. Structural imaging measures of brain aging. *Neuropsychology review*,  
288 24(3):271–289, 2014.
- 289 [5] Johnny Wang, Maria J Knol, Aleksei Tiulpin, Florian Dubost, Marleen de Bruijne, Meike W Vernooij, Hieab HH  
290 Adams, M Arfan Ikram, Wiro J Niessen, and Gennady V Roshchupkin. Gray matter age prediction as a biomarker  
291 for risk of dementia. *Proceedings of the National Academy of Sciences*, 116(42):21213–21218, 2019.
- 292 [6] James H Cole, Stuart J Ritchie, Mark E Bastin, MC Valdés Hernández, S Muñoz Maniega, Natalie Royle, Janie  
293 Corley, Alison Pattie, Sarah E Harris, Qian Zhang, et al. Brain age predicts mortality. *Molecular psychiatry*, 23  
294 (5):1385–1392, 2018.
- 295 [7] James H Cole, Joel Raffel, Tim Friede, Arman Eshaghi, Wallace J Brownlee, Declan Chard, Nicola De Stefano,  
296 Christian Enzinger, Lukas Pirpamer, Massimo Filippi, et al. Longitudinal assessment of multiple sclerosis with  
297 the brain-age paradigm. *Annals of Neurology*, 2020.
- 298 [8] Katja Franke, Gabriel Ziegler, Stefan Klöppel, Christian Gaser, Alzheimer’s Disease Neuroimaging Initiative,  
299 et al. Estimating the age of healthy subjects from t1-weighted mri scans using kernel methods: exploring the  
300 influence of various parameters. *Neuroimage*, 50(3):883–892, 2010.
- 301 [9] Katja Franke, Eileen Luders, Arne May, Marko Wilke, and Christian Gaser. Brain maturation: predicting individual  
302 brainage in children and adolescents using structural mri. *Neuroimage*, 63(3):1305–1312, 2012.
- 303 [10] Christian Gaser, Katja Franke, Stefan Klöppel, Nikolaos Koutsouleris, Heinrich Sauer, Alzheimer’s Disease Neu-  
304 roimaging Initiative, et al. Brainage in mild cognitive impaired patients: predicting the conversion to alzheimer’s  
305 disease. *PloS one*, 8(6):e67346, 2013.
- 306 [11] Sebastian Popescu, Alex Whittington, Roger N Gunn, Paul M Matthews, Ben Glocker, David J Sharp, and James H  
307 Cole. Nonlinear biomarker interactions in conversion from mild cognitive impairment to alzheimer’s disease.  
308 *medRxiv*, page 19002378, 2019.
- 309 [12] James H Cole, Riccardo E Marioni, Sarah E Harris, and Ian J Deary. Brain age and other bodily ‘ages’: implications  
310 for neuropsychiatry. *Molecular psychiatry*, 24(2):266–281, 2019.
- 311 [13] Katja Franke and Christian Gaser. Ten years of brainage as a neuroimaging biomarker of brain aging: What  
312 insights have we gained? *Frontiers in neurology*, 10:789, 2019.
- 313 [14] A Erramuzpe, R Schurr, JD Yeatman, IH Gotlib, MD Sacchet, KE Travis, HM Feldman, and AA Mezer. A  
314 comparison of quantitative r1 and cortical thickness in identifying age, lifespan dynamics, and disease states of  
315 the human cortex. *Cerebral Cortex*, 2020.
- 316 [15] Nicola K Dinsdale, Emma Bluemke, Stephen M Smith, Zobair Arya, Diego Vidaurre, Mark Jenkinson, and Ana IL  
317 Namburete. Learning patterns of the ageing brain in mri using deep convolutional networks. *NeuroImage*, 224:  
318 117401, 2020.
- 319 [16] Arinbjörn Kolbeinsson, Sarah Filippi, Yannis Panagakis, Paul M Matthews, Paul Elliott, Abbas Dehghan, and  
320 Ioanna Tzoulaki. Accelerated mri-predicted brain ageing and its associations with cardiometabolic and brain  
321 disorders. *Scientific Reports*, 10(1):1–9, 2020.
- 322 [17] Deepthi P Varikuti, Sarah Genon, Aristeidis Sotiras, Holger Schwender, Felix Hoffstaedter, Kaustubh R Patil,  
323 Christiane Jockwitz, Svenja Caspers, Susanne Moebus, Katrin Amunts, et al. Evaluation of non-negative matrix  
324 factorization of grey matter in age prediction. *NeuroImage*, 173:394–410, 2018.



- 325 [18] Andrea Cherubini, Maria Eugenia Caligiuri, Patrice Péran, Umberto Sabatini, Carlo Cosentino, and Francesco  
326 Amato. Importance of multimodal mri in characterizing brain tissue and its potential application for individual  
327 age prediction. *IEEE J. Biomedical and Health Informatics*, 20(5):1232–1239, 2016.
- 328 [19] Nick Pawlowski and Ben Glocker. Is texture predictive for age and sex in brain mri? *arXiv preprint*  
329 *arXiv:1907.10961*, 2019.
- 330 [20] Kyriaki-Margarita Bintsi, Vasileios Baltatzis, Arinbjörn Kolbeinsson, Alexander Hammers, and Daniel Rueckert.  
331 Patch-based brain age estimation from mr images. *arXiv preprint arXiv:2008.12965*, 2020.
- 332 [21] Kaiming He, Xiangyu Zhang, Shaoqing Ren, and Jian Sun. Identity mappings in deep residual networks. In  
333 *European conference on computer vision*, pages 630–645. Springer, 2016.
- 334 [22] Ramon Landin-Romero, Rachel Tan, John R Hodges, and Fiona Kumfor. An update on semantic dementia:  
335 genetics, imaging, and pathology. *Alzheimer’s research & therapy*, 8(1):1–9, 2016.
- 336 [23] Lorna Harper, Frederik Barkhof, Philip Scheltens, Jonathan M Schott, and Nick C Fox. An algorithmic approach  
337 to structural imaging in dementia. *Journal of Neurology, Neurosurgery & Psychiatry*, 85(6):692–698, 2014.
- 338 [24] Olaf Ronneberger, Philipp Fischer, and Thomas Brox. U-net: Convolutional networks for biomedical image  
339 segmentation. In *International Conference on Medical image computing and computer-assisted intervention*,  
340 pages 234–241. Springer, 2015.
- 341 [25] Xue Feng, Nicholas J Tustison, Sohil H Patel, and Craig H Meyer. Brain tumor segmentation using an ensemble  
342 of 3d u-nets and overall survival prediction using radiomic features. *Frontiers in Computational Neuroscience*, 14:  
343 25, 2020.
- 344 [26] Sulaiman Vesal, Nishant Ravikumar, and Andreas Maier. A 2d dilated residual u-net for multi-organ segmentation  
345 in thoracic ct. *arXiv preprint arXiv:1905.07710*, 2019.
- 346 [27] James H Cole, Rudra PK Poudel, Dimosthenis Tsagkrasoulis, Matthan WA Caan, Claire Steves, Tim D Spector,  
347 and Giovanni Montana. Predicting brain age with deep learning from raw imaging data results in a reliable and  
348 heritable biomarker. *NeuroImage*, 163:115–124, 2017.
- 349 [28] John Ashburner. A fast diffeomorphic image registration algorithm. *Neuroimage*, 38(1):95–113, 2007.
- 350 [29] Patrick E ShROUT and Joseph L Fleiss. Intraclass correlations: uses in assessing rater reliability. *Psychological*  
351 *bulletin*, 86(2):420, 1979.
- 352 [30] Jie Hu, Li Shen, and Gang Sun. Squeeze-and-excitation networks. In *Proceedings of the IEEE conference on*  
353 *computer vision and pattern recognition*, pages 7132–7141, 2018.
- 354 [31] Ann-Marie G de Lange and James H Cole. Commentary: Correction procedures in brain-age prediction.  
355 *NeuroImage: Clinical*, 26, 2020.
- 356 [32] Han Peng, Weikang Gong, Christian F Beckmann, Andrea Vedaldi, and Stephen M Smith. Accurate brain age  
357 prediction with lightweight deep neural networks. *BioRxiv*, 2019.
- 358 [33] Keith A Johnson, Nick C Fox, Reisa A Sperling, and William E Klunk. Brain imaging in alzheimer disease. *Cold*  
359 *Spring Harbor perspectives in medicine*, 2(4):a006213, 2012.
- 360 [34] Yanica Klein-Koerkamp, Rolf A Heckemann, Kylee T Ramdeen, Olivier Moreaud, Sandrine Keignart, Alexandre  
361 Krainik, Alexander Hammers, Monica Baciú, Pascal Hot, Alzheimer’s disease Neuroimaging Initiative, et al.  
362 Amygdalar atrophy in early alzheimer’s disease. *Current Alzheimer Research*, 11(3):239–252, 2014.
- 363 [35] Heiko Braak and Eva Braak. Neuropathological staging of alzheimer-related changes. *Acta neuropathologica*,  
364 82(4):239–259, 1991.
- 365 [36] Clifford R Jack Jr, Heather J Wiste, Prashanthi Vemuri, Stephen D Weigand, Matthew L Senjem, Guang Zeng,  
366 Matt A Bernstein, Jeffrey L Gunter, Vernon S Pankratz, Paul S Aisen, et al. Brain beta-amyloid measures  
367 and magnetic resonance imaging atrophy both predict time-to-progression from mild cognitive impairment to  
368 alzheimer’s disease. *Brain*, 133(11):3336–3348, 2010.
- 369 [37] Christian Ledig, Andreas Schuh, Ricardo Guerrero, Rolf A Heckemann, and Daniel Rueckert. Structural brain  
370 imaging in alzheimer’s disease and mild cognitive impairment: biomarker analysis and shared morphometry  
371 database. *Scientific reports*, 8(1):1–16, 2018.
- 372 [38] Xiaojuan Guo, Zhiqun Wang, Kuncheng Li, Ziyi Li, Zhigang Qi, Zhen Jin, Li Yao, and Kewei Chen. Voxel-based  
373 assessment of gray and white matter volumes in alzheimer’s disease. *Neuroscience letters*, 468(2):146–150, 2010.
- 374 [39] W. J. Henneman, J. D. Sluimer, J. Barnes, W. M. van der Flier, I. C. Sluimer, N. C. Fox, P. Scheltens, H. Vrenken,  
375 and F. Barkhof. Hippocampal atrophy rates in Alzheimer disease: added value over whole brain volume measures.  
376 *Neurology*, 72(11):999–1007, Mar 2009.



- 377 [40] Shannon L Risacher, Andrew J Saykin, John D Wes, Li Shen, Hiram A Firpi, and Brenna C McDonald. Baseline  
378 mri predictors of conversion from mci to probable ad in the adni cohort. *Current Alzheimer Research*, 6(4):  
379 347–361, 2009.
- 380 [41] Ben Glocker, Robert Robinson, Daniel C Castro, Qi Dou, and Ender Konukoglu. Machine learning with multi-site  
381 imaging data: An empirical study on the impact of scanner effects. *arXiv preprint arXiv:1910.04597*, 2019.
- 382 [42] Nicola K Dinsdale, Mark Jenkinson, and Ana IL Namburete. Unlearning scanner bias for mri harmonisation. In  
383 *International Conference on Medical Image Computing and Computer-Assisted Intervention*, pages 369–378.  
384 Springer, 2020.
- 385 [43] Juha Koikkalainen, Hanneke Rhodius-Meester, Antti Tolonen, Frederik Barkhof, Betty Tijms, Afina W Lemstra,  
386 Tong Tong, Ricardo Guerrero, Andreas Schuh, Christian Ledig, et al. Differential diagnosis of neurodegenerative  
387 diseases using structural mri data. *NeuroImage: Clinical*, 11:435–449, 2016.
