---

## LOCAL BRAIN-AGE: A U-NET MODEL

---

Sebastian G. Popescu<sup>1,2\*</sup>, Ben Glocker<sup>1</sup>, David J. Sharp<sup>2,3</sup>, and James H. Cole<sup>4,5</sup>

<sup>1</sup>Biomedical Image Analysis Group, Imperial College London

<sup>2</sup>Computational, Cognitive & Clinical Neuroimaging Laboratory, Imperial College London

<sup>3</sup>Care Research & Technology Centre, UK Dementia Research Institute

<sup>4</sup>Centre for Medical Image Computing, University College London

<sup>5</sup>Dementia Research Centre, University College London

### ABSTRACT

We propose a new framework for estimating neuroimaging-derived “brain-age” at a local level within the brain, using deep learning. The local approach, contrary to existing global methods, provides spatial information on anatomical patterns of brain ageing. We trained a U-Net model using brain MRI scans from  $n=3463$  healthy people (aged 18-90 years) to produce individualised 3D maps of brain-predicted age. When testing on  $n=692$  healthy people, we found a median (across participant) mean absolute error (within participant) of 9.5 years. Performance was more accurate (MAE around 7 years) in the prefrontal cortex and periventricular areas. We also introduce a new voxelwise method to reduce the age-bias when predicting local brain-age “gaps”. To validate local brain-age predictions, we tested the model in people with mild cognitive impairment or dementia using data from OASIS3 ( $n=267$ ). Different local brain-age patterns were evident between healthy controls and people with mild cognitive impairment or dementia, particularly in subcortical regions such as the accumbens, putamen, pallidum, hippocampus and amygdala. Comparing groups based on mean local brain-age over regions-of-interest resulted in large effects sizes, with Cohen’s  $d$  values  $>1.5$ , for example when comparing people with stable and progressive mild cognitive impairment. Our local brain-age framework has the potential to provide spatial information leading to a more mechanistic understanding of individual differences in patterns of brain ageing in health and disease.

**Keywords** Brain age · Deep learning · Dementia · U-Net · Voxelwise

---

\*s.popescu16@imperial.ac.uk

## 1 Introduction

Brain ageing is associated with cognitive decline and an increased risk of neurodegenerative disease, though these effects vary greatly between individuals. Brain atrophy, often measured using structural MRI, is commonly seen in many neurological diseases [1, 2], but also in the normal ageing process. Even hippocampal atrophy, which is often thought to be characteristic of Alzheimer’s disease, can be seen in many other neurological and psychiatric conditions, and in normal ageing [3]. Evidently, both normal ageing and dementia can affect the same brain regions [4]. This fact complicates research into the earliest stages of age-related neurodegenerative diseases. Determining whether changes are ‘normal’ and or pathological is challenging. The brain-age paradigm can offer information on whether an individual’s brain is changing as expected for their age. The difference between chronological age and “brain-predicted age” obtained from neuroimaging data has been provided insights into the relationship between brain ageing and disease, and may be a useful biomarker for predicting clinical outcomes [5, 6, 7, 8]. For example, in Alzheimer’s Disease (AD), patients have previously been shown to have older-appearing brains, and that individuals with mild cognitive impairment (MCI) who had an older-appearing brain were more likely to progress to dementia [9, 10, 11, 12]. However, despite the growing literature employing the brain-age paradigm [13, 14], current approaches tend to generate brain-age predictions at a global level, with a single value per brain image. While some efforts have been made to derive patterns of ‘feature importance’ or similar from brain-age models [15, 16, 17, 18, 19], these patterns are at population-level, and do not apply to the individual.

**Localized Brain Predicted Age** Obtaining a finer-grained picture of brain-ageing patterns for a given brain disease is likely to provide several benefits. Firstly, neuroanatomical patterns should enable inferences to be made about mechanisms underlying the clinical manifestation of the disease. Secondly, better predictive discrimination between clinical groups should be possible, as different groups are likely to be associated with different spatial patterns of age-related brain changes, even in the case where ‘global’ brain-age differences are similar. Thirdly, the local individualised maps should enable fine-grain characterisation of brain changes over time, as the disease progresses or in response to treatment. Finally, spatial patterns of brain-age could be used to discover clinically-relevant subgroups in a data-driven manner, for example using clustering techniques.

**Related work** Limited prior work on local predictions of brain-age are available. Of note, is the early work of Cherubini et al. [20], who used linear regression models with voxel-level features derived from voxel-based morphometry and diffusion-tensor imaging to demonstrate reasonable prediction results in a small sample of healthy people (n=140). This approach of using a separate linear regression model for each voxel is limited as it does not incorporate contextual information from neighbouring voxels, and is insensitive to non-linear relationships. Other studies have provided local or regional information by training separate models per region e.g., [21], though again this precludes the incorporation of contextual and global information in the local predictions and is limited to the specific anatomical atlas used to define the brain regions.

Some studies have gone further and extracted ‘patch’ level information on brain-age, subsequently averaging predictions across brain regions to arrive at a global-level prediction [22, 23, 24, 25]. In Bintsi et al. [23], the authors use a ResNet [26] for each  $64^3$  3D block, reporting MAE values between 2.16 and 4.19 depending on block origin. While these approaches are promising, the relatively large size of the patch limits spatial resolution which results in less insightful inference in clinical settings. For example, semantic dementia is associated with a relatively localised spatial pattern of atrophy, often the left anterior and middle temporal lobe [27, 28], which could be overlooked by brain-age prediction models that lack spatial resolution. Alternatively, in Beheshti et al. [24], the authors introduce a model based on kernel methods introduced in [29], whereby they predict the grading at  $7^3$  voxel patches. However, the authors use Support Vector Regression to aggregate the patch-level results to arrive at a global level prediction and do not provide patch-level results in the cortical regions. Similarly, [25] proposed a slice-level MRI encoding network, followed by an aggregation method to obtain global-level predictions. Likewise, the authors do not provide results at finer grained scales.

**Contributions** The goal of this work was to develop a model to accurately predict chronological age at the local level in healthy people, by incorporating voxelwise information using deep learning. U-Nets [30], which are typically used for tumor [31] or organ [32] segmentation, provide an excellent framework for voxelwise predictions, as their specific architecture enables the inclusion of contextual spatial information into individual predictions. Here, we introduce a deep learning algorithm that is trained to predict localised brain-age, producing high-resolution maps of brain-predicted age differences (brain-PAD maps) covering the entire brain (see Figure 1). We hypothesised that brain-PAD in healthy people would be centred on zero and would smoothly vary across regions of the brain. We further hypothesised that people with MCI and dementia patients would see higher brain-PAD values in regions previously reported to dementia-related atrophy. We provide an in-depth analysis of the structural differences seen in people with MCI and AD patients. We provide a means to reduce the so-called “age-bias” in brain-PAD maps and examine the reliability of local brain-age predictions, both within and between scanners.

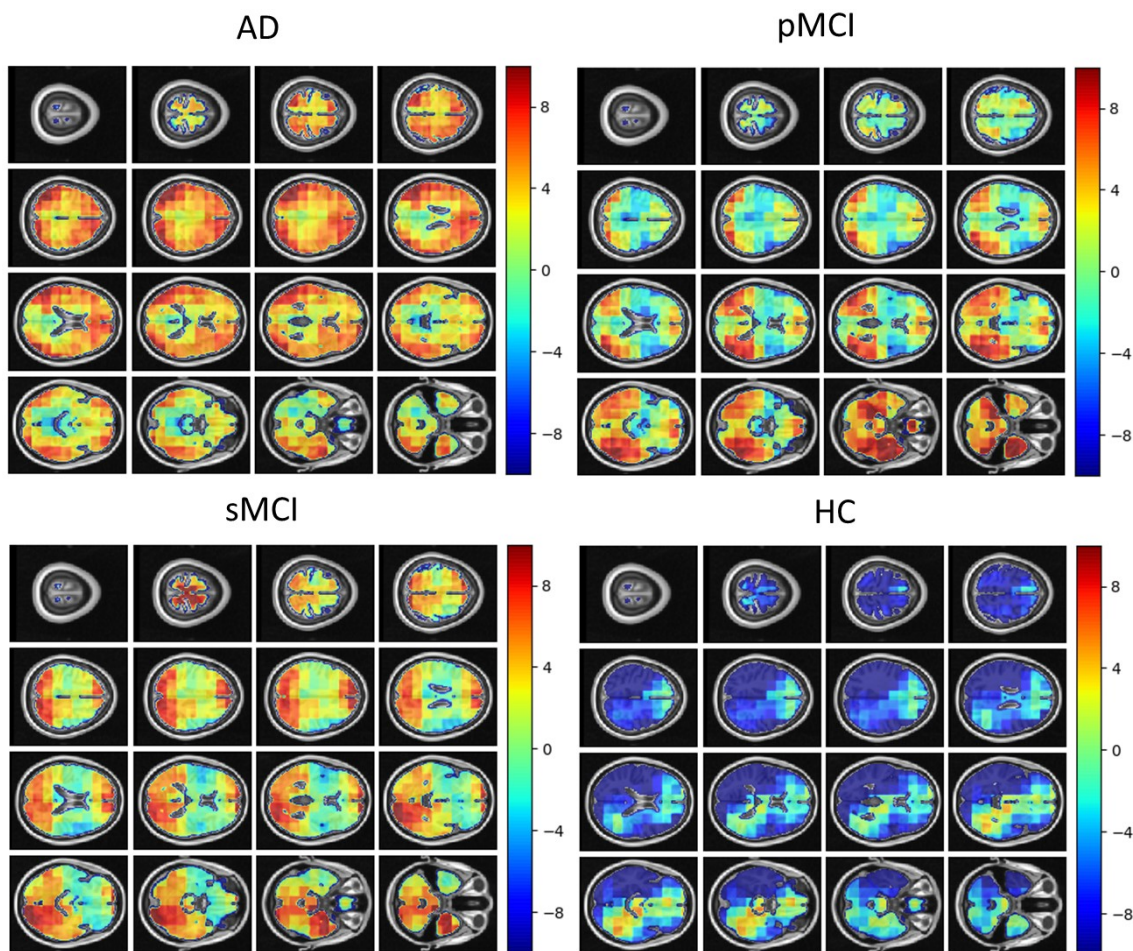

Figure 1: Local brain-PAD maps for randomly sampled participants from clinical groups in cross-sectional OASIS3 dataset. Positive values indicate an increased pattern of local volume differences compared to healthy ageing patterns at the respective age. HC = Healthy Controls, pMCI = progressive MCI, sMCI = stable MCI, AD = Alzheimer's Disease.

## 56 2 Methods

### 57 2.1 Participants

58 To train, test and validate our local brain-age model, we collated multiple datasets comprising T1-weighted MRI brain  
59 scans. All included datasets were from studies that had been reviewed and approved by the local ethics committees  
60 and all participants provided informed consent. All participants were included, notwithstanding exclusions due to  
61 failure during quality control after pre-processing. All data were from publicly accessible databases. The supplementary  
62 material includes all links to access the respective databases, alongside chronological age histograms for each datasets  
63 (see Figure S1).

64 **Brain-Age Healthy Controls (BAHC)** This dataset comprises 2001 healthy individuals with a male/female ratio of  
65 1016/985, with a mean age of  $36.95 \pm 18.12$ , aged 18-90 years. These data are an amalgam of 14 separate publicly-  
66 available datasets, as used in our previous brain-age research [33] (see supplementary material Table S1 for full  
67 details).

68 **Dallas Lifespan Brain Study (DLBS)** This is a major effort designed to understand the antecedents of preservation  
69 and decline of cognitive function at different stages of the adult lifespan, with a particular interest in the early stages of  
70 a healthy brain's march towards Alzheimer Disease. For our purpose we have selected solely the T1-weighted MRI  
71 scans, totaling  $n=315$  healthy participants aged 18-89 years, with a mean age of  $54.61 \pm 20.09$  and male/female ratio of

72 117/198. All participants were scanned on a single 3T Philips Achieva scanner equipped with an 8-channel head coil.  
73 High-resolution anatomical images were collected with a sagittal T1-weighted 3D MP-RAGE sequence (TR = 8.1ms,  
74 TE = 3.7ms, flip angle = 12°, FOV = 204x256x160, slices = 160, voxel size = 1mm isotropic). More information can be  
75 found at <https://dlbsdata.utdallas.edu/>.

76 **Cambridge Centre for Ageing and Neuroscience (Cam-CAN)** This dataset is part of larger project which is trying  
77 to use epidemiological, behavioural and neuroimaging data to understand how individuals can best retain cognitive  
78 abilities into old age. The dataset consists of n=652 T1-weighted MRI scans (3D MPRAGE, TR = 2250ms, TE =  
79 2.99ms, TI = 900ms, flip angle = 9°, FOV = 256x240x192, voxel size = 1mm isotropic, GRAPPA=2) from participants  
80 aged 18-88 years, with a mean age of 54.29±18.59 and a male/female ratio of 322/330. More information can be found  
81 at <https://www.cam-can.org/>.

82 **Southwest University Adult Lifespan Dataset (SALD)** This comprises a large cross-sectional sample (n = 494;  
83 age range = 19-80 years; mean age 45.18±17.44; male/female ratio of 187/307) undergoing a multi-modal (structural  
84 MRI, resting state fMRI, and behavioral) neuroimaging. Only T1-weighted MRI (3D MPRAGE, TR = 1900ms, TE  
85 = 2.52ms, TI = 900ms, flip angle = 90°, matrix = 256x256, slices = 176, voxel size = 1mm isotropic) were used  
86 here. The goals of the SALD are to give researchers the opportunity to map the structural and functional changes the  
87 human brain undergoes throughout adulthood and to replicate previous findings. More information can be found at  
88 [http://fcon\\_1000.projects.nitrc.org/indi/retro/sald.html](http://fcon_1000.projects.nitrc.org/indi/retro/sald.html).

89 **Wayne State** The Wayne State longitudinal data set for the Brain Aging in Detroit Longitudinal Study, comprises  
90 200 healthy individuals, with n=302 total anatomical scans across two waves of data collection and mean age of  
91 53.94±15.58, with a male/female ratio of 37/77. All the participants were screened by the local research centres to be  
92 free from neurological or psychiatric disorders according to well established protocols. All of the neuroimaging data  
93 were acquired either at 1.5T or 3T using standard T1-weighted sequences (TR = 8000ms, TE = 3.93ms, TI = 420ms,  
94 flip angle = 20°), FOV = 256x192x100 averages = 3, voxel size = 0.75x0.075x1.5mm. More information can be found  
95 at [http://fcon\\_1000.projects.nitrc.org/indi/retro/wayne\\_10.html](http://fcon_1000.projects.nitrc.org/indi/retro/wayne_10.html).

96 **Within-scanner reliability dataset** Here we used data from the Imperial College London project, SStudy Of Relia-  
97 bility of MRI (STORM). The study comprises of 20 participants with a male-female ratio of 12/8, with a mean age at  
98 the first scan undertaken of 34.05 ± 8.71. The participants were scanned for the second time at an average distance of  
99 28.35 ± 1.09 days. All participants were free from any neurological or psychiatric disorders. T1-weighted MRI data  
100 were acquired using a Siemens Verio 3T scanner (3D MPRAGE, FOV = 240x256x160, voxel size = 1mm isotropic).

101 **Scanner calibration dataset** This study included 11 participants scanned in two different centres, mean age at first  
102 scan of 30.88 ± 6.16 and with a male/female ration of 7/4. The two scanning sites were at Imperial College London,  
103 where a Siemens Verio 3T scanner was used (3D MPRAGE, FOV = 240x256x160, voxel size = 1mm isotropic), whereas  
104 a Philips Ingenia 3T scanner was used at the Academic Medical Center Amsterdam (T1-TFE, FOV = 256x256x170,  
105 voxel size = 1.05x1.05x1.2mm ). The mean interval between scans was 68.17±92.23 days.

106 **Open Access Series of Imaging Studies (OASIS3)** This is a retrospective compilation of data for >1000 participants  
107 that were collected across several ongoing projects through the WUSTL Knight ADRC over the course of 30 years.  
108 Participants include n=609 cognitively normal adults and n=489 individuals at with MCI or dementia ranging in age  
109 from 42-95 years. Using Clinical Dementia Rating scale (CDR) scores, we classified participants as healthy control  
110 (HC), stable MCI, progressive MCI or AD, as detailed in Table 1. Follow-up CDR scores used to define MCI status  
111 were from at least 3 years after baseline assessments. We excluded scans which did not pass quality standards after  
112 pre-processing pipeline. MRI was collected on 3 different Siemens scanner models: Vision 1.5T, TIM Trio 3T and  
113 BioGraph mMR PET-MR 3T. Further information can be found at <https://www.oasis-brains.org/>.

| Characteristics      | HC<br>(n=128) | sMCI<br>(n=29) | pMCI<br>(n=29) | AD<br>(n=78) |
|----------------------|---------------|----------------|----------------|--------------|
| Males/Females, n     | 70/58         | 15/14          | 18/11          | 33/45        |
| Age, mean (SD) years | 68.14 (9.40)  | 76.44 (6.81)   | 75.72 (7.68)   | 75.02 (8.90) |
| Age, range years     | 42.66-97.11   | 59.2-94.44     | 49.38-93.93    | 50.35-95.58  |
| Baseline CDR         | 0.0           | 0.5            | 0.5            | ≥ 1.0        |
| Follow-up CDR        | 0.0           | 0.5            | ≥ 1.0          | -            |

Table 1: Demographic characteristics for the OASIS3 dataset. CDR = Clinical Dementia Rating scale, HC = Healthy Controls, pMCI = progressive MCI, sMCI = stable MCI, AD = Alzheimer’s Disease.

114 **Australian Imaging Biomarkers and Lifestyle Study of Aging (AIBL)** This study is a study to discover which  
 115 biomarkers, cognitive characteristics, and health and lifestyle factors determine subsequent development of symptomatic  
 116 Alzheimer’s Disease (AD) (<https://aibl.csiro.au/>). The dataset contained n=198 participants with Clinical  
 117 Dementia Rating scale scores, detailed in Table 2.

| Characteristics      | HC<br>(n=83) | sMCI<br>(n=64) | pMCI<br>(n=20) | AD<br>(n=31)  |
|----------------------|--------------|----------------|----------------|---------------|
| Males/Females, n     | 38/45        | 36/26          | 11/9           | 17/14         |
| Age, mean (SD) years | 67.28 (9.70) | 75.83 (8.85)   | 71.86 (9.21)   | 74.23 (10.21) |
| Age, range years     | 60.11-86.45  | 62.54-87.86    | 54.66-81.24    | 61.75-87.89   |
| Baseline CDR         | 0.0          | 0.5            | 0.5            | ≥ 1.0         |
| Follow-up CDR        | 0.0          | 0.5            | ≥ 1.0          | -             |

Table 2: Demographic characteristics for the AIBL dataset. CDR = Clinical Dementia Rating scale, HC = Healthy Controls, pMCI = progressive MCI, sMCI = stable MCI, AD = Alzheimer’s Disease.

## 118 2.2 Data pre-processing

119 All T1-weighted brain MRI scans were pre-processed using the Statistical Parametric Mapping (SPM12) software  
 120 package (<https://www.fil.ion.ucl.ac.uk/spm/software/spm12/>). This entailed tissue segmentation into grey  
 121 matter (GM) and white matter (WM), followed by a nonlinear registration procedure using the DARTEL algorithm [34]  
 122 to the Montreal Neurological Institute 152 (MNI152) space, subsequently followed by resampling to  $1.5mm^3$  with a  
 123 4mm smoothing kernel.

## 124 2.3 Statistical analysis

125 **Inferential statistics** Welch’s t-test was used to compare groups based on voxel, regional and global brain-PAD  
 126 values. Welch’s t-test is an alternative to the standard student’s t-test when the two populations to be compared have  
 127 uneven variance and optionally also uneven sample size. The t statistics to test whether the populations means is given  
 128 by:

$$t = \frac{\bar{X}_1 - \bar{X}_2}{s_{\Delta}} \quad (1)$$

129 where  $s_{\Delta} = \sqrt{\frac{s_1^2}{n_1} + \frac{s_2^2}{n_2}}$  and  $s_i^2$  represents the unbiased estimator of the variance of a respective sample with  $n_i$   
 130 participants. To use the test statistics for significance testing, the degrees of freedom of the associated Student’s  
 131 t-distribution is given by the Welch-Satterthwaite equation:

$$df = \frac{\left(\frac{s_1^2}{n_1} + \frac{s_2^2}{n_2}\right)^2}{\frac{(s_1^2/n_1)^2}{n_1-1} + \frac{(s_2^2/n_2)^2}{n_2-1}} \quad (2)$$

132 **Effect size estimates** To quantify effect sizes when comparing different disease groups we used the standardised  
 133 effect size Cohen’s  $d$ :

$$d = \frac{m_1 - m_2}{\sqrt{\frac{(count_1-1)*var_1 + (count_2-1)*var_2}{count_1 + count_2 - 2}}} \quad (3)$$

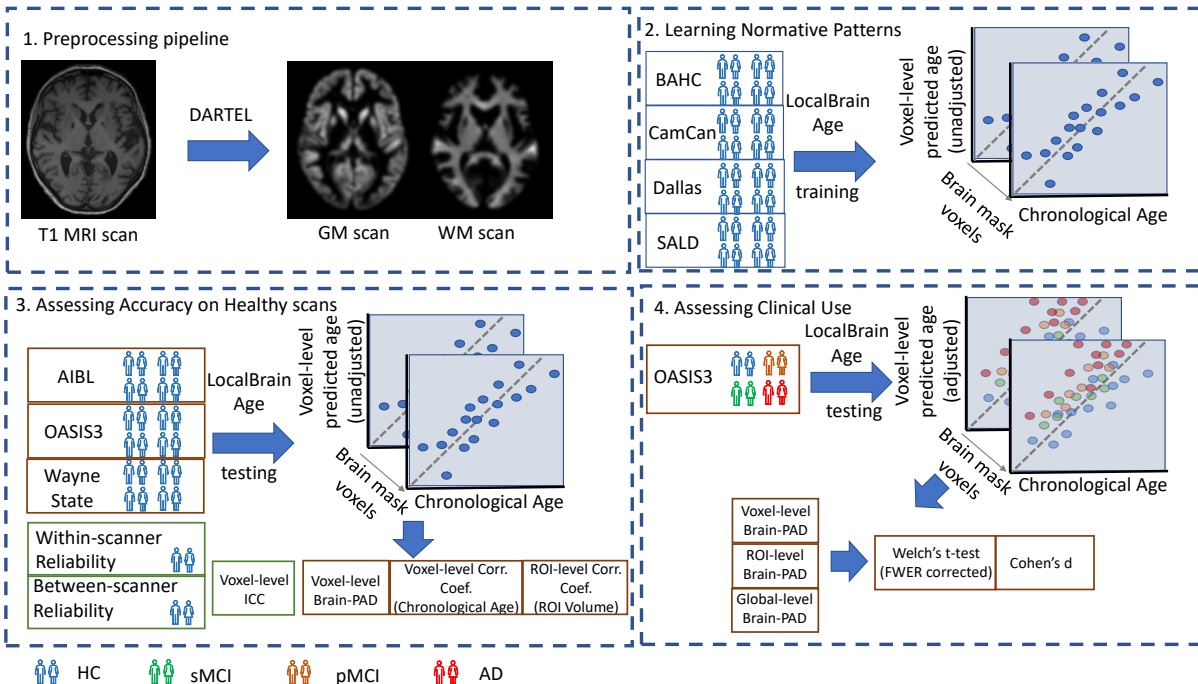

Figure 2: **1. Preprocessing pipeline:** T1-weighted MRI scans from all datasets were tissue segmented and non-linearly registered using SPM12 to generate modulated grey and white matter volume maps. **2. Learning Normative Patterns:** Randomly subsampled participants from BAHC, CamCan, Dallas and SALD (80%/20% split training/validation set) were used to train the local brain-age U-net to learn predict chronological age locally. **3. Assessing Accuracy on Healthy scans:** Using healthy scans from AIBL, OASIS3 and Wayne State we tested age prediction accuracy on unseen data from independent datasets. We calculated descriptive statistics for voxel-level brain-PAD, alongside Pearson’s correlation coefficients between chronological age and voxel-level “brain-ages” and between brain tissues volume and ROI-level “brain-ages” predictions using subcortical and cortical ROIs from the Harvard-Oxford atlas. To assess the reliability of local brain-age predictions with respect to between-scanner and within-scanner differences, we used the Within-scanner reliability dataset and Scanner calibration dataset, computing voxel-level Intra-class Correlation Coefficients (ICC). **4. Assessing Clinical Use:** Using the OASIS3 dataset (healthy controls, stable MCI, progressive MCI and AD participants), we compared groups using Welch’s t-test (family-wise error rate corrected), and calculated Cohen’s  $d$  effect sizes at the voxel, regional and global levels.

134 where  $m_k$  is the mean,  $var_k$  represents the variance, whereas  $count_k$  defines the number of participants within group  $k$ .  
 135 The purpose of this method is to quantify the size of the difference, allowing us to decide if the difference is meaningful.

136 **Intraclass Correlation Coefficient** The intraclass correlation coefficient (ICC) is used to test the reproducibility of a  
 137 certain quantitative measurement made by a specified number of observers which rate the same participant. The original  
 138 formula is given as follows:

$$r = \frac{1}{Ns^2} \sum_{n=1}^N (x_{n,1} - \tilde{x})(x_{n,2} - \tilde{x}) \quad (4)$$

139 where  $\tilde{x} = \frac{1}{2N} \sum_{n=1}^N (x_{n,1} + x_{n,2})$  and  $s^2 = \frac{1}{2N} \{ \sum_{n=1}^N (x_{n,1} - \tilde{x})^2 + \sum_{n=1}^N (x_{n,2} - \tilde{x})^2 \}$

140 Here, we used ICC[2,1] as defined by Shrout and Fleiss [35]. The interval of values ranges from  $[-1, 1]$  with values  
 141 closer to 1 denoting that the observers (e.g., MRI scans or scanners) agree with each other.

## 142 2.4 Study design

143 In this subsection we summarize the design of our experiments and which datasets are used in each step.

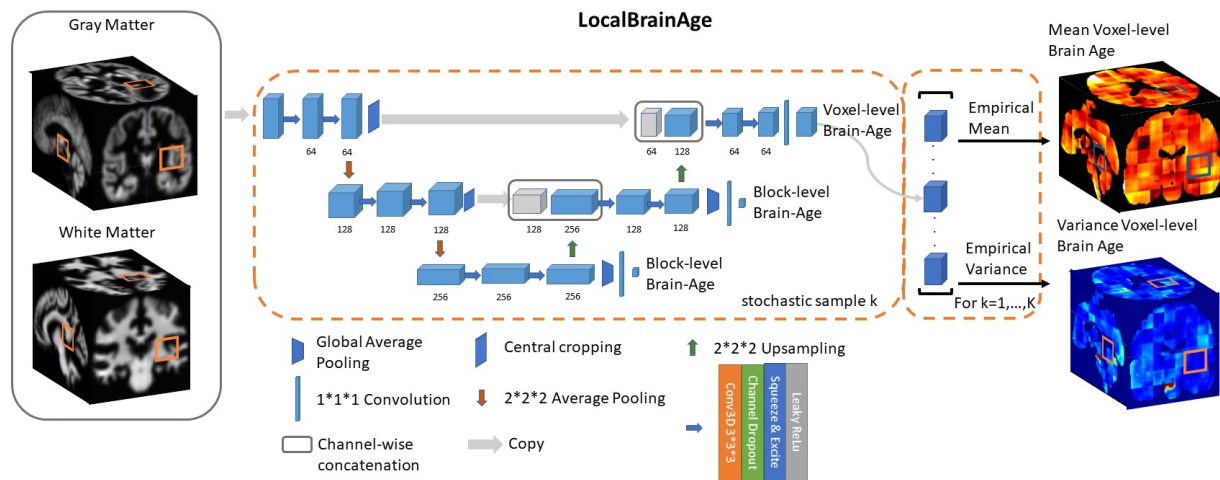

Figure 3: U-Net architecture for voxel-level brain-age prediction. Raw T1-weighted MRI scans were pre-processed using SPM12, obtaining modulated grey and white matter volume maps registered to the MNI152 template. Additional auxiliary block-level brain-age loss functions were added at each level of the U-Net to facilitate training.

- 144 • BAHC, CamCan, Dallas and SALD were used as training and validation sets (80/20 split) for training the local  
 145 brain-age U-net model.
- 146 • All Wayne State participants and healthy participants from OASIS3 and AIBL were used at testing time. We  
 147 calculated mean absolute error (MAE) values globally (by averaging across voxel-level brain-predicted age for  
 148 each participant) and at voxel level, alongside the Pearson’s correlation coefficient between chronological age  
 149 brain-predicted age at both global and voxel level.
- 150 • Within-scanner reliability and Scanner calibration datasets were used as test sets to compute voxel-level ICC  
 151 values to assess the reliability of local brain-age when the same participant is scanned in two different scanners,  
 152 respectively one the same scanner with short time interval.
- 153 • Using subcortical and cortical ROIs from the Harvard-Oxford structural brain atlas, we obtained brain tissues  
 154 volumes ( $\text{mm}^3$ ) for each ROI, alongside ROI-level brain-PAD values which were computed by first averaging  
 155 voxel-level “brain-predicted age” inside an ROI, then subtracting the participant’s chronological age. We  
 156 calculated a Pearson’s correlation coefficient for each ROI.
- 157 • OASIS3 was used at testing time to assess the sensitivity of local brain-age to differences in brain structure  
 158 between groups. For each participant we computed an mean across voxels global brain-PAD (adjusted for age  
 159 bias), which we use then to perform Welch’s t-test between disease groups, correcting for multiple comparisons  
 160 using the Bonferroni method. The same method was then applied to local-level brain-PAD values, which were  
 161 pooled to create a “population” of brain-PAD values at voxel-level. To assess effect sizes of between-group  
 162 differences we calculated Cohen’s  $d$  coefficient at global and voxel levels. Lastly, to assess regional differences  
 163 between disease groups, we used the Harvard-Oxford cortical and subcortical structural atlas, which contains  
 164 48 cortical and 21 subcortical structural ROI. We then calculated differences in mean local brain-PAD per ROI  
 165 between groups using Welch’s t-test (Bonferroni corrected), again computing Cohen’s  $d$  effect sizes. For all  
 166 experiments in this part we have selected subjects above 60 years old from the healthy controls so as to have a  
 167 similar chronological age distribution in relation to the groups with varying degrees of cognitive impairment.

168 A visual overview of the study design is portrayed in Figure 2.

## 169 2.5 Local “Brain-age” Prediction

170 We used a fully convolutional neural network (CNN) inspired by the U-Net architecture introduced in Ronneberger et al.  
 171 [30]. Our network architecture is illustrated in Figure 3. Input images were the output from SPM12 pre-processing,  
 172 representing voxelwise maps of GM and WM volume. These images were split into overlapping 3-dimensional  
 173 blocks of size  $52^3$  voxels. The convolutional layers in our network used an isotropic  $3 \times 3 \times 3$  filter, convolved over  
 174 the input image after which element-wise multiplication with the filter weights and subsequent summation was

175 performed at each location. Subsequently, to allow for non-linear modelling, we passed the obtained values through an  
176 “activation function”; we used a LeakyReLU with  $\alpha=0.2$ .  $LeakyReLU(\alpha)$  are defined by the following equation  
177  $LeakyReLU(x) = \max(x, 0) + \min(x * \alpha, 0)$ , thus allowing a small, non-zero gradient when the unit is not active.

178 The convolution operation is also controlled by its stride, which is how many pixels/voxels are skipped after every  
179 element-wise weight multiplication and summation. We set the stride equal to 1.

180 Downsampling increases the effective field of view or “receptive field” of layers higher in the hierarchy. For the  
181 downsampling part of the U-Net we used at each scale two consecutive 3D 3x3x3 filter kernels with an initial number  
182 of channels = 64, which get multiplied by 2 as we progress down the downsampling path. For downsampling we used  
183 2x2x2 average pooling.

184 For the upsampling part of the U-Net we inverted the downsampling architecture, with the downsampling layers being  
185 replaced by 2x2x2 upsampling layers. At each convolution we used a squeeze-and-excite unit. Squeeze & Excite  
186 networks were introduced in Hu et al. [36] and can be viewed as computationally less intensive method of performing  
187 attention over the channels of a given feature block. Finally, at the end of the network we obtain predictions over  $12^3$   
188 voxels blocks.

189 Besides the voxel-level mean absolute error cost function on the output layer we introduced two additional cost functions  
190 at the two other scales of the architecture. We applied global average pooling followed by a dense layer to predict  
191 brain-age at block-level. The loss function can be expressed as follows:

$$L = \sum_{i=1}^M |y_i - \tilde{y}_i^{voxel}| + \alpha_1 \sum_{i=1}^M |y_i - \tilde{y}_i^{block1}| + \alpha_2 \sum_{i=1}^M |y_i - \tilde{y}_i^{block2}| \quad (5)$$

192 During training, we observed that the addition of these auxiliary loss functions helped stabilise the learning process.  
193 During training,  $\alpha_1$  and  $\alpha_2$  are progressively decreased so that the gradients will exclusively flow from the voxel-level  
194 predictions after 50,000 training iterations. We used Adam [37] for optimizing our loss function with a learning rate set  
195 to 0.0001. We trained our model for 500,000 iterations, with a minibatch size of 32 (gradient averaging over four splits).  
196 We split our healthy participant datasets into training (80%) and validation (20%) sets and the stopping criteria was set  
197 based on a visual inspection of the validation loss reaching a plateau. The model was implemented in Tensorflow [38].

## 198 2.6 Removing bias in predictions

199 Subtracting chronological age from estimated brain age provides a measure of the difference between an individual’s  
200 predicted age and chronological age, also known as the brain-age ‘gap’, brain-predicted age difference (brain-PAD) or  
201 brain-age ‘delta’. A so-called ‘regression dilution’ has been commonly observed in brain-age prediction algorithms,  
202 caused by noise in the neuroimaging features leading to a greater under- or over-estimate of age, the further away  
203 a sample is from the training set mean age. In other words, this effect results in the systematic under-estimation of  
204 brain-predicted age for older participants and over-estimation for younger participants, which increases as model  
205 performance decreases.

### 206 2.6.1 Global-level

207 Broadly speaking, two approaches to account for this effect have been reported:

$$\Delta = \alpha * Age + \beta \quad (6)$$

208 where  $\Delta$  is the brain-age delta of a group of participants from an external dataset that is used specifically for adjusting  
209 the bias.  $\alpha$  and  $\beta$  are the parameters of a linear regression with the covariate  $Age$  representing chronological age.

210 Then, to obtain the bias-adjusted age we have the following equation:

$$\tilde{\Delta} = \Delta - \alpha * Age + \beta \quad (7)$$

211 Another approach involves using the brain-predicted age in the linear regression, more specifically:

$$\tilde{\Delta} = \Delta - \alpha * \tilde{y} + \beta \quad (8)$$

212 where  $\tilde{y}$  denotes the brain-predicted age. de Lange and Cole [39] showed that using either formulation results in the  
213 same statistical outcome in comparing different disease groups. The authors also argue against using bias adjusted  
214 predictions at testing time to assess overall accuracy of the model. However, this standard method used for global-level  
215 brain-age prediction did not succeed in de-biasing our predictions at voxel-level. Additional results using this approach  
216 are shown in the supplementary material (see Figure S2).



## 217 2.6.2 Voxel-level

218 Here, we used a separate small batch ( $n=200$ ) of participants randomly selected from the healthy participant datasets  
219 (BAHC, CamCan, Dallas, SALD), who were not included in the training or validation set. We obtained testing time  
220 predictions for these participants and calculated their voxel-level brain-age delta  $\Delta_{i,v}$ , where  $i$  indicates the  $i$ -th  
221 participant and  $v$  the  $v$ -th voxel. We then binned these participants based on their chronological age (5-year intervals,  
222 expect the first being between 18-25 years). Then, for each bin  $b$  we calculated the average voxel-level brain-age delta  
223 for that respective bin, which we denote as  $\Delta_{b,v}$ . This value will represent the average brain-age delta for that voxel  
224 given the chronological age interval. Subsequently, to de-bias the voxel-level brain-age delta for a new participant (e.g.,  
225 from testing set),  $\tilde{\Delta}_{j,v}$  we used the following formula:

$$\tilde{\Delta}_{j,v} = \Delta_{j,v} - \Delta_{b,v} \quad (9)$$

226 This method was used subsequent analysis where indicated.

## 227 3 Results

### 228 3.1 Local brain-age model performance in independent healthy test datasets

229 We tested the local brain-age model on healthy participants combined from the OASIS3 ( $n = 128$ ), AIBL ( $n = 83$ ) and  
230 Wayne State ( $n = 200$ ) datasets. Individual local brain-age maps from example participants are shown in Figure 1.  
231 When looking at voxel-level MAE (unadjusted) values across the brain mask (Figure 4a), we mean values for AIBL  
232 of  $10.84 \pm 2.05$  (median 10.43) years, for Wayne State  $9.28 \pm 1.05$  (median 9.08) years, and OASIS3  $9.70 \pm 1.53$   
233 (median 9.33) years. The voxel-level MAE (unadjusted) values of the model varied in different brain regions. We  
234 observed lower values across the different sites in the prefrontal cortex and subcortical regions and higher MAE in  
235 the occipital lobe, cerebellum and brainstem (Figure 5a). The correlation coefficient between chronological age and  
236 voxel-level predicted brain-age (unadjusted) across participants showed similar patterns, with higher values obtained  
237 in the prefrontal cortex and subcortical regions (Figure 5b). We obtained a global-level MAE (unadjusted) value by  
238 averaging the voxel-level brain-predicted ages across voxels for a given participant. For AIBL, we obtain an average of  
239  $10.23 \pm 7.08$  years (median = 8.86;  $r = 0.47$ ), for Wayne State  $8.09 \pm 6.08$  years (median = 6.92;  $r = 0.78$ ), respectively  
240 for OASIS3 we get an average of  $8.08 \pm 6.40$  years (median = 6.26;  $r = 0.72$ ). Figure 4b shows the mean voxel-level  
241 brain-predicted age for each participant against chronological age.

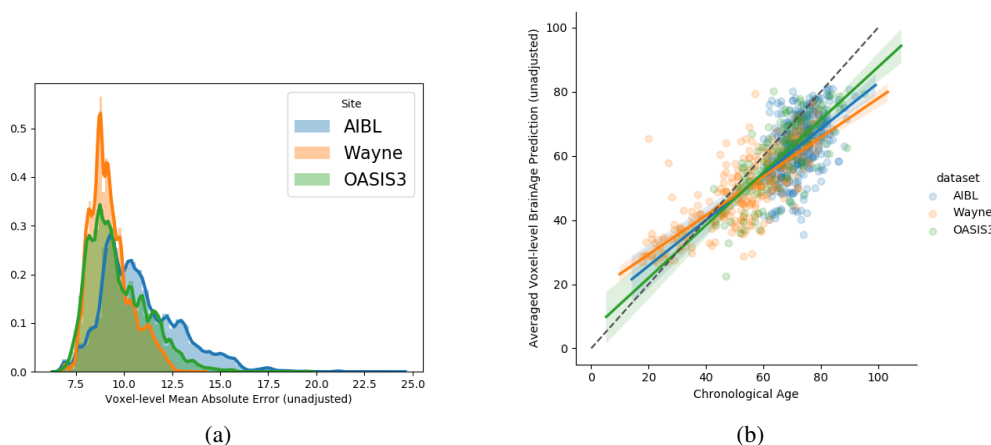

Figure 4: **a)** : Histogram of unadjusted, voxel-level MAE values across participants for each voxel. **b)**: global-level MAE (unadjusted) values plotted against chronological age.

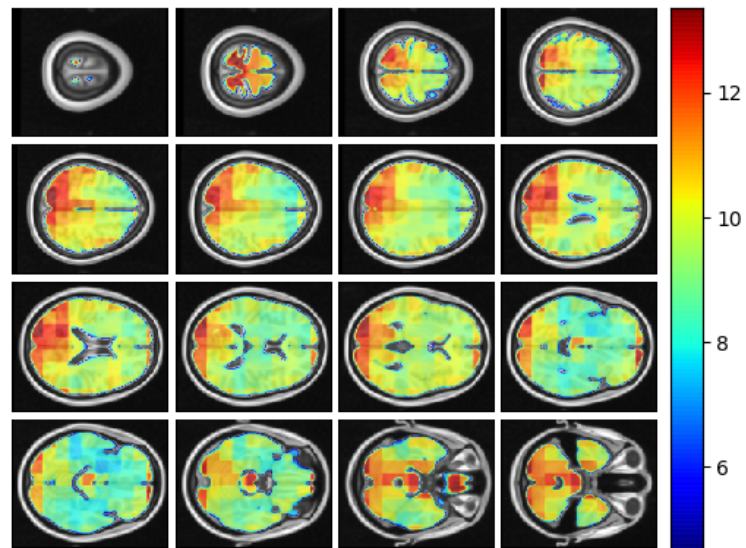

(a)

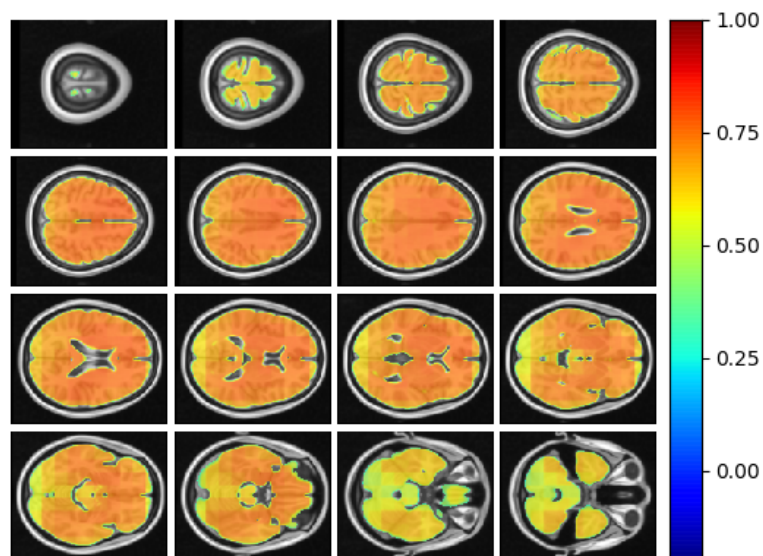

(b)

Figure 5: **a)** Axial slices showing the spatial heterogeneity in unadjusted across participants voxel-level MAE values; **b)** Pearson's correlation coefficient between chronological age and voxel-level predicted brain-age (unadjusted) across participants.

| Subcortical ROI name | Left Hemisphere | Right Hemisphere |
|----------------------|-----------------|------------------|
| <b>Amygdala</b>      | -0.48           | -0.48            |
| <b>Caudate</b>       | -0.13           | -0.19            |
| <b>Hippocampus</b>   | -0.42           | -0.46            |
| <b>Pallidum</b>      | -0.19           | -0.17            |
| <b>Putamen</b>       | -0.32           | -0.32            |
| <b>Thalamus</b>      | -0.34           | -0.43            |
| <b>Accumbens</b>     | -0.23           | -0.30            |

Table 3: Pearson’s correlation coefficient ( $r$ ) for different subcortical ROIs from the Harvard-Oxford atlas between ROI-level brain tissue volume and ROI-level brain-PAD.

### 242 3.2 Regional brain volumes and regional brain-PAD in healthy individuals

243 In this subsection we explored ROI-level results, based on the Harvard-Oxford atlas. We include cortical region results  
 244 in the supplementary material (Table S2). From Table 3 we can observe that the amygdala, hippocampus and thalamus  
 245 have the strongest negative Pearson’s correlation coefficients between ROI-level brain-PAD and ROI-level volumes  
 246 (Figure 6).

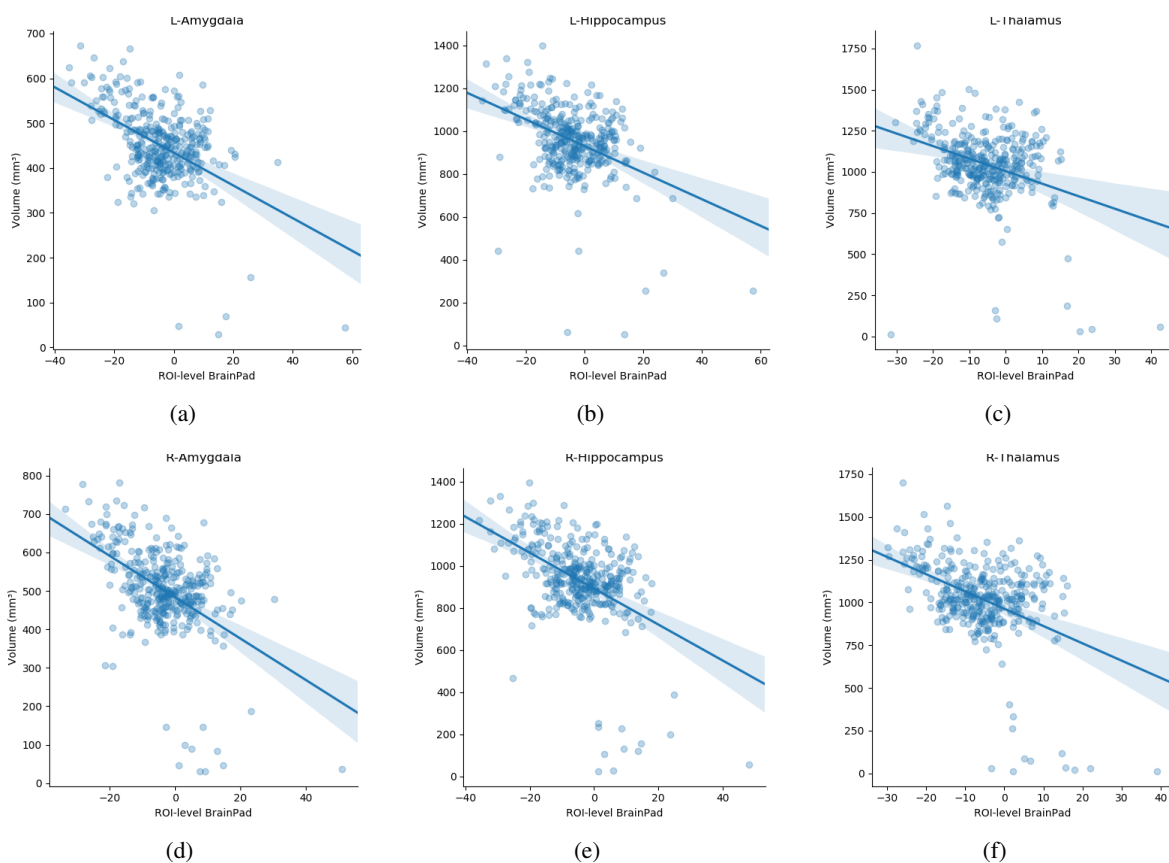

Figure 6: Scatterplots of ROI-level brain-PAD and brain volume ( $\text{mm}^3$ ). Volumes were generated using regional templates from the Harvard-Oxford atlas. **a)** Left amygdala, **b)** Left hippocampus. **c)** Left thalamus. **d)** Right amygdala. **e)** Right hippocampus. **f)** Right thalamus.

### 247 3.3 Reliability of local brain-age

248 Using voxel-level brain-age values for the Within-scanner (test-retest) and Scanner calibration (between-scanner)  
 249 datasets, ICC was calculated per voxel. Test-retest reliability was very high with the vast majority of voxels having  
 250  $\text{ICC} < 0.90$  (median  $\text{ICC} = 0.98$ ). This indicated very high reliability of local brain-age predictions within the same

251 scanner. We observed comparatively lower ICC values at the extremities of the brain, see Figure 7b. This could be due  
252 to residual misregistration or partial volume effects. Between-scanner reliability was lower, with median voxel-level  
253 ICC = 0.62. Interestingly, the pattern of ICC varied across the brain, with higher values observed in the prefrontal  
254 cortex and lower values in more inferior regions, particularly the brainstem and cerebellum (Figure 7d).

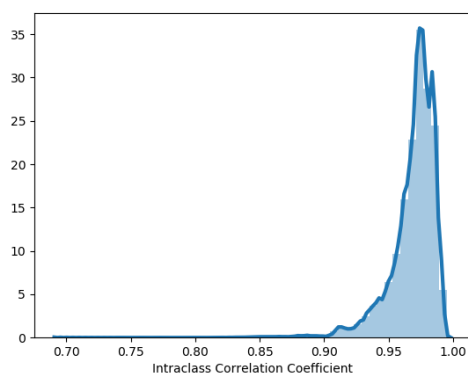

(a) Within-scanner variability

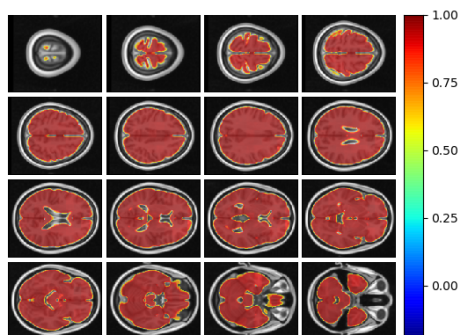

(b) Within-scanner variability

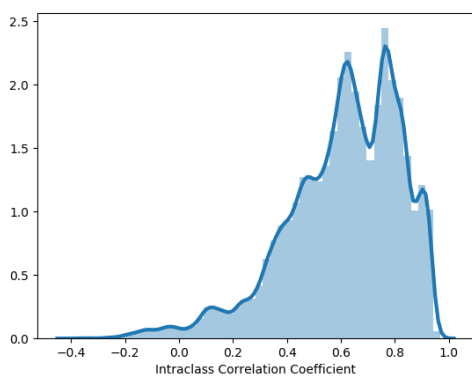

(c) Between-scanner variability

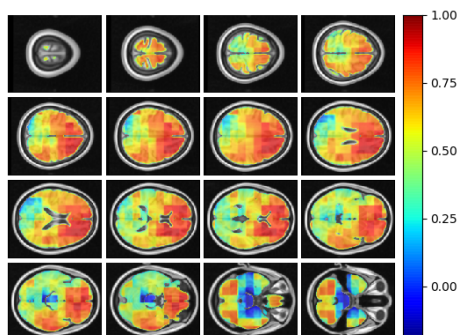

(d) Between-scanner variability

Figure 7: **a)**: Histogram of Intra-class Correlation Coefficients computed at voxel-level on STORM dataset. Values above 0.9 indicate strong agreements. **b)**: ICC values at different views on the axial plane on test-retest (i.e., within-scanner) dataset (n=20). **c)**: Histogram of Intra-class Correlation Coefficients computed at voxel-level on between-scanner reliability dataset (n=11, Siemens and Philips scanners). **d)**: ICC values at different axial slices from the between-scanner dataset.

### 255 3.4 Local brain-age differences between healthy controls, people with MCI and dementia patients

256 We examined patterns of local and global brain-age in people with MCI and dementia patients using cross-sectional  
257 data from OASIS3. Firstly, we investigated if the global-level (i.e., averaged within participant) brain-predicted age  
258 (adjusted) corresponds to previously reported differences from models that directly predict global brain age. We  
259 averaged voxel-level brain-age (adjusted) across voxels per individual to generate an adjusted global-level brain age and  
260 then calculate global-level brain-PAD. Global-level brain-PAD (adjusted) mean ( $\pm$  standard deviation) values were:  
261  $-0.65 \pm 7.46$  (median=0.95) years for healthy controls,  $3.07 \pm 4.29$  (median = 2.83) years for stable MCI (sMCI),  $5.77$   
262  $\pm 5.41$  (median = 4.94) years for progressive MCI (pMCI) and  $4.34 \pm 6.78$  (median = 4.63) years for AD patients.

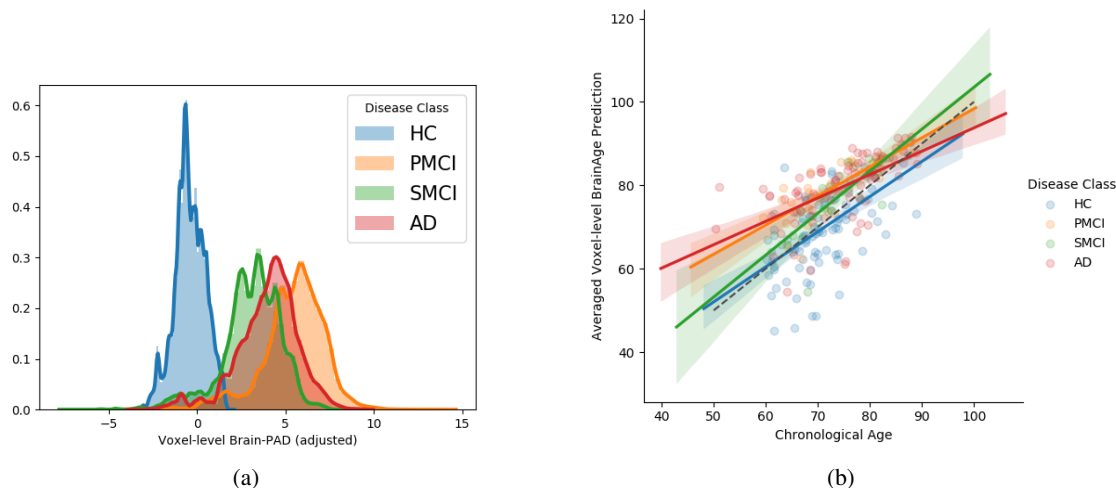

Figure 8: **a)** Histogram at voxel-level of brain-PAD scores of certain clinical groups from OASIS3. Brain-PAD after applying the bias-adjustment scheme is calculated for every voxel and then aggregated to the mean across all participants. Histograms in the plot are composed of the mean brain-PAD values for all voxels in the brain; **b)** Adjusted global-level predictions averaged across voxels for each participant; HC = Healthy controls, sMCI= stable MCI, pMCI = progressive MCI, AD = Alzheimer’s disease

| Disease Groups | HC                | sMCI                 | pMCI                 | AD                   |
|----------------|-------------------|----------------------|----------------------|----------------------|
| HC             | -                 | -1284.67<br>(<0.001) | -2095.58<br>(<0.001) | -1606.19<br>(<0.001) |
| sMCI           | -2.18<br>(0.0369) | -                    | -684.57<br>(<0.001)  | 272.44<br>(<0.001)   |
| pMCI           | -3.67<br>(0.0007) | -1.44<br>(0.1611)    | -                    | -411.23<br>(<0001)   |
| AD             | -3.64<br>(0.0004) | 0.83<br>(0.4141)     | -0.90<br>(0.3714)    | -                    |

Table 4: Group comparisons of brain-age in OASIS3 participants. Upper triangle: Voxel-level brain-age comparisons using paired Welch’s t-test results (t statistics value (p-value)) between disease groups. Lower triangle: Global-level brain-age comparisons using independent Welch’s t-test results (t statistics value (p-value)) between disease groups.

263 We then assessed the significance of group differences using global-level brain-PAD values by performing independent  
 264 two-sample Welch’s t-tests, finding significant differences between cognitively impaired groups and healthy controls in  
 265 all cases (HC-AD  $t = -3.64$ ,  $p = 0.0004$ ,  $df = 88.96$ , Cohen’s  $d = -0.70$ ; HC-sMCI  $t = -2.18$ ,  $p = 0.0369$ ,  $df = 29.29$ ,  
 266 Cohen’s  $d = -0.53$ ; HC-pMCI  $t = -3.67$ ,  $p = 0.0007$ ,  $df = 38.66$ , Cohen’s  $d = -0.92$ ). Comparisons between stable and  
 267 progressive MCI patients and with AD patients were not significant: sMCI-pMCI  $p = 0.161$ ,  $t = -1.44$ ,  $df = 26.44$ ,  
 268 Cohen’s  $d = -0.54$ , AD-sMCI  $t = 0.83$ ,  $p = 0.414$ ,  $df = 20.64$ , Cohen’s  $d = 0.19$ , AD-pMCI  $t = -0.90$ ,  $p = 0.3714$ ,  $df =$   
 269  $28.51$ , Cohen’s  $d = -0.21$ .

270 Next, we examined local brain-PAD, summarising across all voxels within group. The mean voxel-level brain-PAD  
 271 (adjusted) values were: healthy controls =  $-0.39 \pm 0.85$  (median =  $-0.44$ ) years, sMCI =  $3.07 \pm 1.67$  (median =  $3.266$ )  
 272 years, pMCI =  $5.45 \pm 1.74$  (median =  $5.663$ ) years for pMCI, AD patients =  $4.01 \pm 1.71$  (median =  $4.229$ ) years (Figure  
 273 8b). We then compared groups based on these voxel-level brain-PAD values (adjusted) (Table 4 upper triangular part)  
 274 using paired Welch’s t-test. Likewise, differences between participants MCI or dementia and healthy controls were  
 275 significant (HC-sMCI  $t = -1284.67$ ,  $p < 0.0001$ ,  $df = 723943.40$ , Cohen’s  $d = -2.60$ ; HC-pMCI  $t = -2095.58$ ,  $p < 0.0001$ ,  
 276  $df = 707525.16$ , Cohen’s  $d = -4.25$ ; HC-AD  $t = -1606.19$ ,  $p < 0.0001$ ,  $df = 971564.04$ , Cohen’s  $d = -3.25$ ). In contrast to  
 277 the global-level results (lower triangle in Table 4), all pairwise differences between groups with MCI or dementia were  
 278 significant (sMCI-pMCI  $t = -684.57$ ,  $p < 0.001$ ,  $df = 970331.23$ , Cohen’s  $d = -1.38$ ; sMCI-AD  $t = 272.44$ ,  $p < 0.001$ ,  $df =$   
 279  $971564.04$ , Cohen’s  $d = 0.55$ ; pMCI-AD  $t = -411.23$ ,  $p < 0.001$ ,  $df = 971487.0$ , Cohen’s  $d = -0.83$ ).

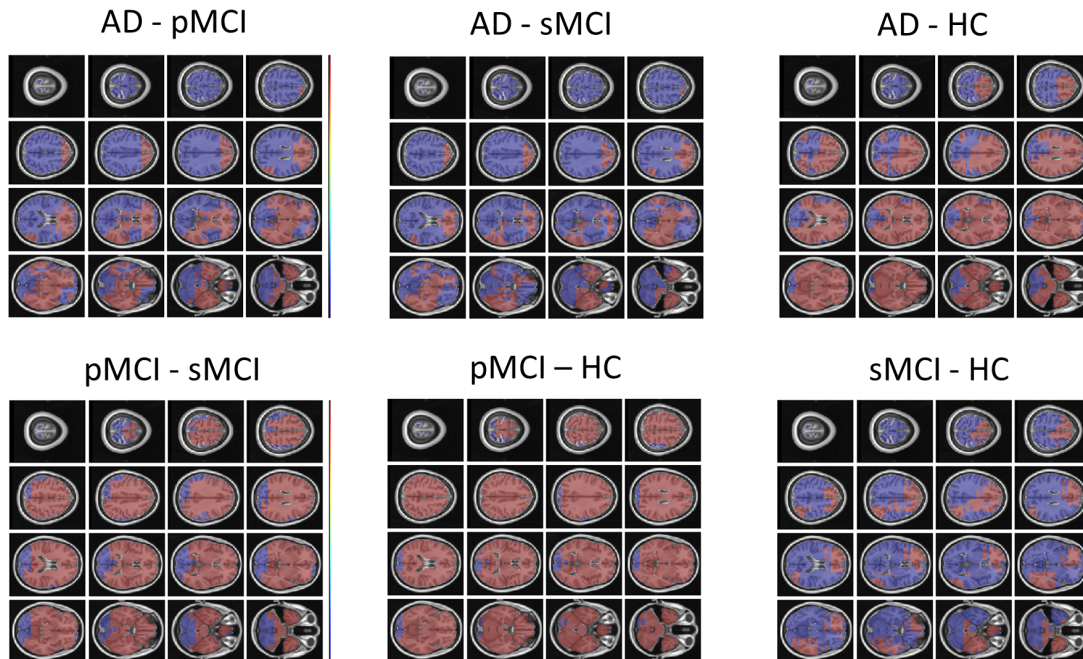

Figure 9: FSL Randomise maps for different combinations of clinical groups in cross-sectional OASIS3. Red colored voxels indicate a significant statistical t-test after correcting for multiple comparisons. Blue regions were not significant after correction. HC=Healthy Controls; pMCI = progressive MCI; sMCI = stable MCI; AD=Alzheimer’s Disease.

| Subcortical ROI name     | AD vs. HC Left         | pMCI vs. sMCI Left    | AD vs. HC Right        | pMCI vs. sMCI Right   |
|--------------------------|------------------------|-----------------------|------------------------|-----------------------|
| <b>Brain Stem</b>        | -159.23 (<0.001/1.82)  | -111.17 (<0.001/0.53) | -                      | -                     |
| <b>Amygdala</b>          | -89.70 (<0.001/4.41)   | -83.48 (<0.001/1.43)  | -74.61 (<0.001/4.00)   | -66.36 (<0.001/1.57)  |
| <b>Caudate</b>           | -97.02 (<0.001/4.69)   | -98.82 (<0.001/1.69)  | -101.28 (<0.001/4.41)  | -102.43 (<0.001/1.47) |
| <b>Cerebral Cortex</b>   | -576.47 (<0.001/1.98)  | -539.03 (<0.001/0.81) | -562.68 (<0.001/1.93)  | -528.37 (<0.001/0.89) |
| <b>Cerebral WM</b>       | -1083.13 (<0.001/5.29) | -857.54 (<0.001/2.48) | -1018.97 (<0.001/4.32) | -867.04 (<0.001/2.56) |
| <b>Hippocampus</b>       | -145.32 (<0.001/4.95)  | -131.04 (<0.001/1.72) | -146.84 (<0.001/5.77)  | -139.80 (<0.001/2.65) |
| <b>Lateral Ventricle</b> | -9.77 (<0.001/0.30)    | -9.67 (<0.001/0.11)   | -8.57 (<0.001/0.27)    | -8.37 (<0.001/0.09)   |
| <b>Pallidum</b>          | -191.76 (<0.001/11.80) | -314.02 (<0.001/5.91) | -215.40 (<0.001/13.31) | -175.65 (<0.001/8.31) |
| <b>Putamen</b>           | -562.54 (<0.001/15.59) | -382.47 (<0.001/6.82) | -427.50 (<0.001/10.66) | -306.99 (<0.001/5.13) |
| <b>Thalamus</b>          | -148.15 (<0.001/4.02)  | -148.75 (<0.001/1.60) | -165.48 (<0.001/4.80)  | -162.59 (<0.001/2.11) |
| <b>Accumbens</b>         | -461.68 (<0.001/30.02) | -205.64 (<0.001/9.60) | -472.20 (<0.001/31.00) | -209.78 (<0.001/9.80) |

Table 5: Welch’s t-test statistic (p-value/Cohen’s *d*) values for different subcortical ROIs from the Harvard-Oxford atlas. For Cohen’s *d*, higher values indicate a positive effect size for the first disease group specified.

280 From Figure 9 we can observe that local brain-age model is able to detect group differences across the whole brain  
 281 when comparing healthy controls with AD patients or comparing the pMCI group with the sMCI group (after correction  
 282 for multiple comparisons). Other group contrasts showed more varied spatial patterns of significant voxels. From Figure  
 283 10 we can observe that the largest differences are in the temporal lobe and subcortical regions when comparing AD  
 284 patients to healthy controls. For a more in-depth look at differences between disease groups, we extended the analysis  
 285 to investigate atlas-based subcortical ROIs. The nucleus accumbens, putamen, pallidum and hippocampus were the  
 286 most discriminative ROIs in terms of Cohen’s *d* scores both for separating AD patients from healthy controls and stable  
 287 from progressive MCI (Table 5). We also include histograms of the local brain-PAD scores for each disease group per  
 288 subcortical ROI to visualise the different distributions that drive the report effect sizes (Figure 11). For example, the  
 289 high Cohen’s *d* values for the nucleus accumbens may be due to the low variance in brain-PAD values in this small  
 290 region. We have provided similar graphics for the cortical regions in the supplementary material (Figure S6).

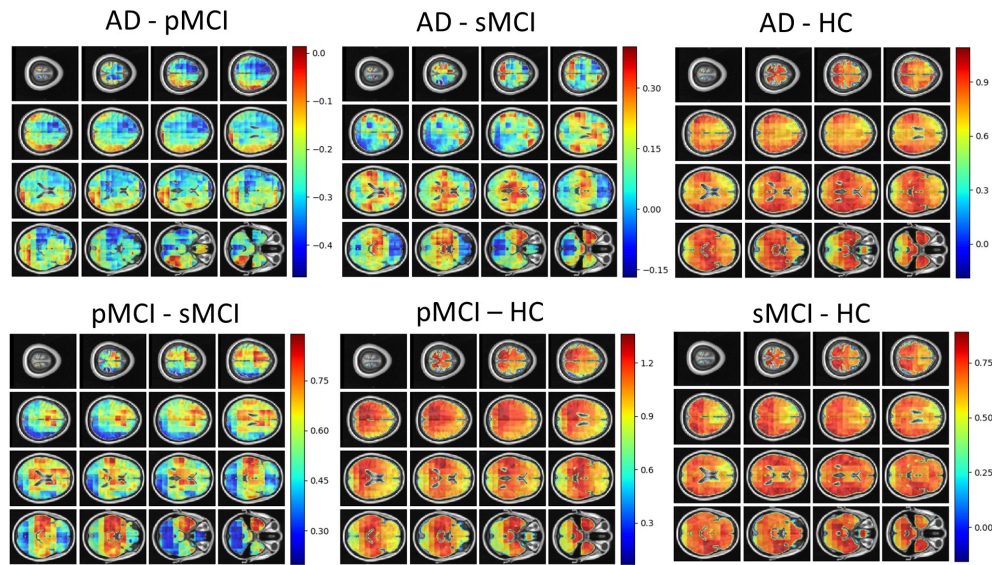

Figure 10: Cohen's  $d$  maps for different combinations of cross-sectional comparisons of clinical groups in OASIS3. Positive values indicate a positive effect for the first group. HC=Healthy Controls; pMCI = progressive MCI; sMCI = stable MCI; AD=Alzheimer's Disease.

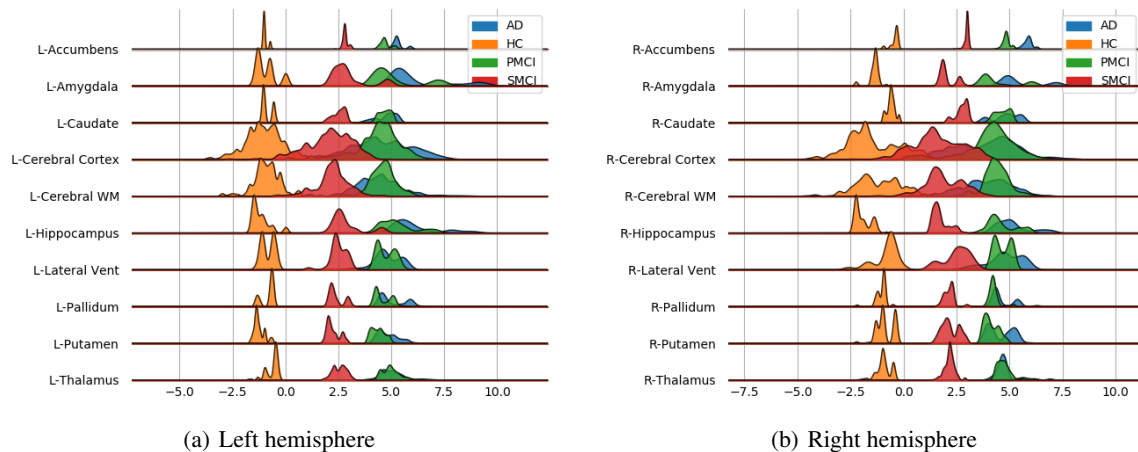

Figure 11: Subcortical ROI-based difference in voxel level brain-PAD scores averaged across participants from clinical groups from OASIS3. X axis shows brain-PAD values within the given ROI; HC = Healthy controls, sMCI= stable MCI, pMCI = progressive MCI, AD = Alzheimer's disease

## 291 4 Discussion

292 In this paper, we introduced a novel deep-learning framework capable of reliably predicting age from neuroimaging  
293 data at a local neuroanatomical level. Training the powerful U-net architecture on  $n=3463$  healthy people, we present  
294 the first proof-of-concept, to our knowledge, that generating such localised brain-age predictions is feasible. While  
295 average performance of our model ( $MAE = 9.94 \pm 1.73$  years) is below what has been reported with purely global  
296 ( $MAE \approx 3$  years, [40]), slice-level ( $MAE$  between 5-7.5 years, [41]), or patch-level ( $MAE$  2.5-4 years, [23]), we show  
297 both high reliability and reasonable generalisability to three entirely independent datasets (OASIS3, AIBL, Wayne  
298 State). Importantly, we achieved a resolution of  $23^3$  voxels, substantially more fine-grain than previous patch-level  
299 work ( $64^3$  voxels [23]). In fact, we were able to generate voxel-level prediction, though as within-block homogeneity  
300 was high, our effective resolution was lower than single voxel. Future improvements to network architecture may be  
301 able to improve the effective resolution still further.

302 Even though the mean global performance of the local brain-age model was relatively poor, the model still demonstrated  
303 sensitivity to cognitive impairment and dementia, suggesting that despite the noise at test time, the relevant signal can  
304 still be observed. Previous work involving brain-age and dementia have obtained “brain-AGE” scores of -0.2 years  
305 for sMCI, 6.2 years for pMCI and 6.7 years for AD on the ADNI dataset [10]. Our results are generally in line with  
306 these previous findings, though here, we observed “older-appearing” brains our sMCI group (mean brain-PAD = 2.8  
307 years). Moreover, we were able to generate spatial maps of brain-PAD for each individual, showing how the patterns of  
308 brain-ageing may vary across the brain in a single patient. At the local level, we observed widespread patterns of group  
309 differences in brain-PAD maps, including when comparing sMCI and pMCI groups, suggesting that brain-ageing is  
310 more pronounced in those MCI patients who go on to develop dementia within three years.

311 It has been commonly reported that the early stages of AD involve atrophy in the medial temporal lobe (MTL) including  
312 the hippocampus, and the amygdala, entorhinal and parahippocampal cortices [42, 43, 44, 45]. Our voxel-level  
313 analysis showed brain-PAD differences between healthy controls and people with MCI in these key AD-related regions.  
314 Furthermore, the ROI-level analysis of brain-PAD should widespread differences with particularly strong effects in the  
315 nucleus accumbens, putamen, pallidum, hippocampus and amygdala as well as cortical and ventricular regions. While  
316 further research is required to further improve the model performance and spatial precision, these results suggest that  
317 the local brain-age predictions are sensitivity to local patterns of brain atrophy.

318 The validity of the predictions from the local brain-age model are further supported by the observed significant negative  
319 correlations between ROI volumes and ROI-level brain-PAD. In a similar analysis, Levakov et al. [19] identified  
320 the lateral ventricles, inferior lateral ventricles, 3rd ventricles, non-ventricles CSF and left/right choroid plexus as  
321 the ROIs (using the FreeSurfer Desikan-Killiany atlas) having the strongest relationships between age normalised  
322 volume and brain-age “gap”. Here, we also show relationships in GM ROIs (e.g., amygdala, hippocampus, thalamus,  
323 parahippocampal gyrus (anterior division), inferior temporal gyrus, temporal-occipital part, intracalcarine cortex). As  
324 lower brain volumes are associated with ageing, the observed negative relationships between ROI volume and ROI  
325 brain-PAD suggests that indeed the ROI-level brain-PAD captures some age-related variance.

326 As biomarker of brain health, brain-age models may have clinical utility, either prognostically or in the context of  
327 clinical trials of neuroprotective treatments. While previous studies have reported standardised effect sizes from global  
328 brain-age, we used atlas ROIs to summarise regional values of local brain-PAD and generated Cohen’s  $d$  values from  
329 pairwise group comparisons. Using conventional hippocampal volumetric measures, Henneman et al. [46] reported  
330 baseline effect size of 0.73 when comparing controls and MCI groups, and 0.33 when comparing people with MCI and  
331 AD patients. With our local brain-age framework, the control-MCI effect size for the hippocampus (average bilaterally)  
332 was  $d = 5.45$  and the MCI-AD effect size was  $d = 0.48$ . Using voxel-based morphometry, [47] generated Cohen’s  $d$   
333 values for the hippocampus ( $d = 0.6$ ) and amygdala ( $d = 0.45$ ), when comparing stable and progressive MCI patients.  
334 Here, our local brain-age framework resulted in  $d = 2.18$  for the hippocampus and  $d = 1.5$  for the bilateral amygdala  
335 in the same context. This suggests that use of the brain-age paradigm to capture local age-related changes, relative  
336 to a healthy ageing model, could increase statistical power in experimental research and clinical trials, relative to  
337 conventional volumetric imaging biomarkers. Potentially, the ROI-based brain-PAD values could even be used in a  
338 classification framework to distinguish between people with stable or progressive MCI.

339 Out proposed U-Net local brain-age framework has some strengths and weaknesses. Our model was assessed on a large  
340 multi-site testing set with a flat distribution of chronological age across the adult lifespan (18-90 years; Figure S1), a  
341 wider interval than a number of studies that rely on UK Biobank [40, 23, 25] or other narrower-age range studies. Our  
342 model showed excellent test-retest reliability, giving confidence that the model could be applied longitudinally to assess  
343 individual patterns of brain-ageing changes. However, the between-scanner reliability was moderate, similar to our  
344 previous work using deep learning to predict brain age [33]. In the latter work, brain-age prediction was performed  
345 directly on raw MRI scans, hence the deep learning model may be overfitting to some site or effects. One might  
346 expect that image pre-processing may partially ameliorate these site effects. However, this is not uniformly the case, as



347 previous research has demonstrated [48]. Consequently, one drawback of the current algorithm is the requirement to  
348 have a healthy population from a given clinical site to use as a control group, as site or scanner effects may result in the  
349 local brain-PAD distribution not being centred at zero. In Supplementary Figures S7 and S8 we show that these scanner  
350 effects have only a marginal effect on the statistical comparisons between MCI or dementia groups using the AIBL  
351 dataset in reference to our main results from OASIS3. Nevertheless, harmonisation of scanner and site is a key direction  
352 for future work as the removal of residual scanner effects is likely to improve model generalisability considerably and is  
353 an important prerequisite for the clinical adoption of neuroimaging biomarker pipelines.

354 We trained our regression U-Net with the ground truth objective at a voxel-level (given by a three-dimensional block  
355 filled with the chronological age), in order to encourage the network to emphasise the context encoded in its lower  
356 layers. As the individual voxel location we are aiming to obtain a prediction for is not necessarily related to the imposed  
357 ground truth output, the U-Net architecture is biased towards using the context information. Hence, in the worst case  
358 scenario where no voxel-level relationship is learned, the true resolution of our voxel-level predictions is actually blocks  
359 of  $23^3$  voxels. The final output field-of-view (FOV) was calculated starting from the first convolutional layer where the  
360 FOV is  $3^3$  voxels, which gets increased by  $2^3$  voxels per convolutional operation in the downstream part of the U-Net.  
361 The average pooling layers increase the FOV by  $1^3$  voxels, since their stride is set to 1, while the upsampling layers do  
362 not increase the FOV as they merely repeat existing information. Lastly, the first convolutional layer in the upstream  
363 layers only adds  $1^3$  voxels (since a  $2 * 2 * 2$  block inside the operating field of the  $3 * 3 * 3$  filter contains the same  
364 repeated information, hence no increase in the FOV) whereas the second adds  $3^3$  voxels (since a  $3 * 3 * 3$  filter will  
365 have access to 3 additional voxels stemming from the upsampling layer). While this means that our resolution is not  
366 necessarily at the voxel-level,  $23^3$  voxels is still substantially higher resolution compared to existing models in literature.  
367 In the 3D block approach of Binti et al. [23], blocks are much larger,  $64^3$  voxels voxels. Hence, any block-level age  
368 prediction will be biased towards the global-level brain age prediction as the blocks include a substantial portion of the  
369 overall brain. Moreover, in splitting the whole brain into blocks, naturally some blocks will include non-brain tissue or  
370 empty space, which will naturally reduce the amount of discriminative information present there, reducing the validity  
371 of results for regions within the respective block.

372 We demonstrated how our U-net framework can predict age from neuroimaging data. However, this approach could be  
373 trained on any continuous or categorical outcome measure to generate individual maps of how given outcomes vary  
374 across the brain. For example, one could generate spatial maps of predicted values of fluid biomarkers (e.g., amyloid,  
375 tau), genotype or polygenic risk score, cognitive measures (e.g., MMSE scores). Such an approach could be used as an  
376 alternative to techniques like VBM, to provide mechanistic insights into the relationship between local brain regions  
377 and individual deviations from healthy/normal levels of a given outcome measure. While VBM is the *de facto* method  
378 to quantitatively assess differences between groups at voxel-level [49], we believe the local brain-age framework is  
379 complementary to this. In VBM analysis, one assesses the statistical models at a voxel level based on volume or  
380 intensity, though local context is only really accounted for at the cluster inference stage. Brain-PAD implicitly measures  
381 this deviation of the diseases group from what constitutes a normative pattern of ageing, by placing the participant on a  
382 distribution of normative ageing for a given local area (i.e., the voxel and its local context). We leave for further work  
383 the comparison between VBM and local brain-age.

384 One potential direction to take local brain-age further is in disease subtyping. Local brain-PAD maps could be used as  
385 input to clustering algorithms with the goal of identifying subgroups of patients that have spatially similar patterns of  
386 brain ageing. The putative subgroups may undergo distinct pathological processes that effect different regions of  
387 the brain and may have different trajectories of disease progression or may respond differently to treatments. Such  
388 approaches have been applied to volumetric brain maps before [50], but the addition of brain-PAD information as a  
389 local index of age-adjusted brain health could increase sensitivity, as has been seen in global brain-age research [51].

390 **Conclusion** We have introduced a new deep learning framework that is capable of reliably estimating brain-age with  
391 high spatial resolution, providing information on spatial patterns of age-related changes to brain volume. We were able  
392 to demonstrate the potential clinical relevance of the model by mapping differences in local and regional brain-PAD  
393 scores in patients with cognitive impairment and dementia. This work illustrates how the sensitivity of conventional  
394 global brain-age analysis can be augmented with individualised spatial maps offering potential mechanistic insights,  
395 with the goal of opening the “black box” of the machine learning algorithms that underpin the brain-age paradigm.

396 **Data and code availability statement** The data used in these experiments are available on applica-  
397 tion to the relevant studies. The code used is available at [https://github.com/SebastianPopescu/](https://github.com/SebastianPopescu/U-NET-for-LocalBrainAge-prediction)  
398 [U-NET-for-LocalBrainAge-prediction](https://github.com/SebastianPopescu/U-NET-for-LocalBrainAge-prediction) alongside the pre-trained models.

## 399 **5 Acknowledgments**

400 SGP is funded by an EPSRC Centre for Doctoral Training studentship award to Imperial College London. BG  
401 received funding from the European Research Council (ERC) under the European Union's Horizon 2020 research  
402 and innovation programme (grant agreement No 757173, project MIRA, ERC-2017-STG). DJS is supported by the  
403 NIHR Biomedical Research Centre at Imperial College Healthcare NHS Trust and the UK Dementia Research Institute  
404 (DRI) Care Research and Technology Centre. JHC acknowledges funding from UKRI/MRC Innovation Fellowship  
405 (MR/R024790/2).

## 406 **6 Disclosure of competing interests**

407 BG has received grants from European Commission and UK Research and Innovation Engineering and Physical Sciences  
408 Research Council, during the conduct of this study; and is Scientific Advisor for Kheiron Medical Technologies, Advisor  
409 and Scientific Lead of the HeartFlow-Imperial Research Team, and Visiting Researcher at Microsoft Research. JC is  
410 a shareholder in and Scientific Advisor to BrainKey and Claritas Healthcare, both medical image analysis software  
411 companies.

## 412 **7 Credit authorship contribution statement**

413 Sebastian G. Popescu: Conceptualisation, Methodology, Software, Formal analysis, Investigation, Writing - original  
414 draft, Writing - review & editing, Visualisation. Ben Glocker: Conceptualisation, Methodology, Writing - review &  
415 editing, Supervision. David J.Sharp: Conceptualisation, Methodology, Writing - review & editing, Supervision. James  
416 H. Cole : Conceptualisation, Methodology, Writing - review & editing, Supervision.

## 417 References

- 418 [1] Abhijit Chaudhuri. Multiple sclerosis is primarily a neurodegenerative disease. *Journal of neural transmission*,  
419 120(10):1463–1466, 2013.
- 420 [2] Valentina Lorenzetti, Nicholas B Allen, Alex Fornito, and Murat Yücel. Structural brain abnormalities in major  
421 depressive disorder: a selective review of recent mri studies. *Journal of affective disorders*, 117(1-2):1–17, 2009.
- 422 [3] MP Laakso, Kaarina Partanen, P Riekkinen, Maarit Lehtovirta, E-L Helkala, Merja Hallikainen, Tuomo Hanninen,  
423 Paula Vainio, and Hilka Soininen. Hippocampal volumes in alzheimer’s disease, parkinson’s disease with and  
424 without dementia, and in vascular dementia an mri study. *Neurology*, 46(3):678–681, 1996.
- 425 [4] Samuel N Lockhart and Charles DeCarli. Structural imaging measures of brain aging. *Neuropsychology review*,  
426 24(3):271–289, 2014.
- 427 [5] Johnny Wang, Maria J Knol, Aleksei Tiulpin, Florian Dubost, Marleen de Bruijne, Meike W Vernooij, Hieab HH  
428 Adams, M Arfan Ikram, Wiro J Niessen, and Gennady V Roshchupkin. Gray matter age prediction as a biomarker  
429 for risk of dementia. *Proceedings of the National Academy of Sciences*, 116(42):21213–21218, 2019.
- 430 [6] James H Cole, Stuart J Ritchie, Mark E Bastin, MC Valdés Hernández, S Muñoz Maniega, Natalie Royle, Janie  
431 Corley, Alison Pattie, Sarah E Harris, Qian Zhang, et al. Brain age predicts mortality. *Molecular psychiatry*, 23  
432 (5):1385–1392, 2018.
- 433 [7] James H Cole, Joel Raffel, Tim Friede, Arman Eshaghi, Wallace J Brownlee, Declan Chard, Nicola De Stefano,  
434 Christian Enzinger, Lukas Pirpamer, Massimo Filippi, et al. Longitudinal assessment of multiple sclerosis with  
435 the brain-age paradigm. *Annals of Neurology*, 2020.
- 436 [8] Francesca Biondo, Amelia Jewell, Megan Pritchard, Dag Aarsland, Claire J Steves, Christoph Mueller, and  
437 James H Cole. Brain-age predicts subsequent dementia in memory clinic patients. *medRxiv*, 2021.
- 438 [9] Katja Franke, Gabriel Ziegler, Stefan Klöppel, Christian Gaser, Alzheimer’s Disease Neuroimaging Initiative,  
439 et al. Estimating the age of healthy subjects from t1-weighted mri scans using kernel methods: exploring the  
440 influence of various parameters. *Neuroimage*, 50(3):883–892, 2010.
- 441 [10] Katja Franke, Eileen Luders, Arne May, Marko Wilke, and Christian Gaser. Brain maturation: predicting individual  
442 brainage in children and adolescents using structural mri. *Neuroimage*, 63(3):1305–1312, 2012.
- 443 [11] Christian Gaser, Katja Franke, Stefan Klöppel, Nikolaos Koutsouleris, Heinrich Sauer, Alzheimer’s Disease Neu-  
444 roimaging Initiative, et al. Brainage in mild cognitive impaired patients: predicting the conversion to alzheimer’s  
445 disease. *PloS one*, 8(6):e67346, 2013.
- 446 [12] Sebastian Popescu, Alex Whittington, Roger N Gunn, Paul M Matthews, Ben Glocker, David J Sharp, and James H  
447 Cole. Nonlinear biomarker interactions in conversion from mild cognitive impairment to alzheimer’s disease.  
448 *medRxiv*, page 19002378, 2019.
- 449 [13] James H Cole, Riccardo E Marioni, Sarah E Harris, and Ian J Deary. Brain age and other bodily ‘ages’: implications  
450 for neuropsychiatry. *Molecular psychiatry*, 24(2):266–281, 2019.
- 451 [14] Katja Franke and Christian Gaser. Ten years of brainage as a neuroimaging biomarker of brain aging: What  
452 insights have we gained? *Frontiers in neurology*, 10:789, 2019.
- 453 [15] A Erramuzpe, R Schurr, JD Yeatman, IH Gotlib, MD Sacchet, KE Travis, HM Feldman, and AA Mezer. A  
454 comparison of quantitative r1 and cortical thickness in identifying age, lifespan dynamics, and disease states of  
455 the human cortex. *Cerebral Cortex*, 2020.
- 456 [16] Nicola K Dinsdale, Emma Bluemke, Stephen M Smith, Zobair Arya, Diego Vidaurre, Mark Jenkinson, and Ana IL  
457 Namburete. Learning patterns of the ageing brain in mri using deep convolutional networks. *NeuroImage*, 224:  
458 117401, 2020.
- 459 [17] Arinbjörn Kolbeinsson, Sarah Filippi, Yannis Panagakis, Paul M Matthews, Paul Elliott, Abbas Dehghan, and  
460 Ioanna Tzoulaki. Accelerated mri-predicted brain ageing and its associations with cardiometabolic and brain  
461 disorders. *Scientific Reports*, 10(1):1–9, 2020.
- 462 [18] Deepthi P Varikuti, Sarah Genon, Aristeidis Sotiras, Holger Schwender, Felix Hoffstaedter, Kaustubh R Patil,  
463 Christiane Jockwitz, Svenja Caspers, Susanne Moebus, Katrin Amunts, et al. Evaluation of non-negative matrix  
464 factorization of grey matter in age prediction. *NeuroImage*, 173:394–410, 2018.
- 465 [19] Gidon Levakov, Gideon Rosenthal, Ilan Shelef, Tammy Riklin Raviv, and Galia Avidan. From a deep learning  
466 model back to the brain—identifying regional predictors and their relation to aging. *Human brain mapping*, 41  
467 (12):3235–3252, 2020.

- 468 [20] Andrea Cherubini, Maria Eugenia Caligiuri, Patrice Péran, Umberto Sabatini, Carlo Cosentino, and Francesco  
469 Amato. Importance of multimodal mri in characterizing brain tissue and its potential application for individual  
470 age prediction. *IEEE J. Biomedical and Health Informatics*, 20(5):1232–1239, 2016.
- 471 [21] Tobias Kaufmann, Dennis van der Meer, Nhat Trung Doan, Emanuel Schwarz, Martina J Lund, Ingrid Agartz,  
472 Dag Alnæs, Deanna M Barch, Ramona Baur-Streubel, Alessandro Bertolino, et al. Common brain disorders are  
473 associated with heritable patterns of apparent aging of the brain. *Nature neuroscience*, 22(10):1617–1623, 2019.
- 474 [22] Nick Pawlowski and Ben Glocker. Is texture predictive for age and sex in brain mri? *arXiv preprint*  
475 *arXiv:1907.10961*, 2019.
- 476 [23] Kyriaki-Margarita Bintsis, Vasileios Baltatzis, Arinbjörn Kolbeinsson, Alexander Hammers, and Daniel Rueckert.  
477 Patch-based brain age estimation from mr images. *arXiv preprint arXiv:2008.12965*, 2020.
- 478 [24] Iman Beheshti, Pierre Gravel, Olivier Potvin, Louis Dieumegarde, and Simon Duchesne. A novel patch-based  
479 procedure for estimating brain age across adulthood. *Neuroimage*, 197:618–624, 2019.
- 480 [25] Umang Gupta, Pradeep K Lam, Greg Ver Steeg, and Paul M Thompson. Improved brain age estimation with  
481 slice-based set networks. In *2021 IEEE 18th International Symposium on Biomedical Imaging (ISBI)*, pages  
482 840–844. IEEE, 2021.
- 483 [26] Kaiming He, Xiangyu Zhang, Shaoqing Ren, and Jian Sun. Identity mappings in deep residual networks. In  
484 *European conference on computer vision*, pages 630–645. Springer, 2016.
- 485 [27] Ramon Landin-Romero, Rachel Tan, John R Hodges, and Fiona Kumfor. An update on semantic dementia:  
486 genetics, imaging, and pathology. *Alzheimer's research & therapy*, 8(1):1–9, 2016.
- 487 [28] Lorna Harper, Frederik Barkhof, Philip Scheltens, Jonathan M Schott, and Nick C Fox. An algorithmic approach  
488 to structural imaging in dementia. *Journal of Neurology, Neurosurgery & Psychiatry*, 85(6):692–698, 2014.
- 489 [29] Pierrick Coupé, Simon F Eskildsen, José V Manjón, Vladimir S Fonov, D Louis Collins, Alzheimer's Dis-  
490 ease Neuroimaging Initiative, et al. Simultaneous segmentation and grading of anatomical structures for patient's  
491 classification: application to alzheimer's disease. *NeuroImage*, 59(4):3736–3747, 2012.
- 492 [30] Olaf Ronneberger, Philipp Fischer, and Thomas Brox. U-net: Convolutional networks for biomedical image  
493 segmentation. In *International Conference on Medical image computing and computer-assisted intervention*,  
494 pages 234–241. Springer, 2015.
- 495 [31] Xue Feng, Nicholas J Tustison, Sohil H Patel, and Craig H Meyer. Brain tumor segmentation using an ensemble  
496 of 3d u-nets and overall survival prediction using radiomic features. *Frontiers in Computational Neuroscience*, 14:  
497 25, 2020.
- 498 [32] Sulaiman Vesal, Nishant Ravikumar, and Andreas Maier. A 2d dilated residual u-net for multi-organ segmentation  
499 in thoracic ct. *arXiv preprint arXiv:1905.07710*, 2019.
- 500 [33] James H Cole, Rudra PK Poudel, Dimosthenis Tsagkrasoulis, Matthan WA Caan, Claire Steves, Tim D Spector,  
501 and Giovanni Montana. Predicting brain age with deep learning from raw imaging data results in a reliable and  
502 heritable biomarker. *NeuroImage*, 163:115–124, 2017.
- 503 [34] John Ashburner. A fast diffeomorphic image registration algorithm. *Neuroimage*, 38(1):95–113, 2007.
- 504 [35] Patrick E Shrout and Joseph L Fleiss. Intraclass correlations: uses in assessing rater reliability. *Psychological*  
505 *bulletin*, 86(2):420, 1979.
- 506 [36] Jie Hu, Li Shen, and Gang Sun. Squeeze-and-excitation networks. In *Proceedings of the IEEE conference on*  
507 *computer vision and pattern recognition*, pages 7132–7141, 2018.
- 508 [37] Diederik P Kingma and Jimmy Ba. Adam: A method for stochastic optimization. *arXiv preprint arXiv:1412.6980*,  
509 2014.
- 510 [38] Martín Abadi, Paul Barham, Jianmin Chen, Zhifeng Chen, Andy Davis, Jeffrey Dean, Matthieu Devin, Sanjay  
511 Ghemawat, Geoffrey Irving, Michael Isard, et al. Tensorflow: A system for large-scale machine learning. In *12th*  
512 *{USENIX} symposium on operating systems design and implementation ({OSDI} 16)*, pages 265–283, 2016.
- 513 [39] Ann-Marie G de Lange and James H Cole. Commentary: Correction procedures in brain-age prediction.  
514 *NeuroImage: Clinical*, 26, 2020.
- 515 [40] Han Peng, Weikang Gong, Christian F Beckmann, Andrea Vedaldi, and Stephen M Smith. Accurate brain age  
516 prediction with lightweight deep neural networks. *BioRxiv*, 2019.
- 517 [41] Pedro L Ballester, Laura Tomaz da Silva, Matheus Marcon, Nathalia Bianchini Esper, Benicio N Frey, Augusto  
518 Buchweitz, and Felipe Meneguzzi. Predicting brain age at slice level: convolutional neural networks and  
519 consequences for interpretability. *Frontiers in Psychiatry*, 12:118, 2021.

- 520 [42] Keith A Johnson, Nick C Fox, Reisa A Sperling, and William E Klunk. Brain imaging in alzheimer disease. *Cold*  
521 *Spring Harbor perspectives in medicine*, 2(4):a006213, 2012.
- 522 [43] Yanica Klein-Koerkamp, Rolf A Heckemann, Kylee T Ramdeen, Olivier Moreaud, Sandrine Keignart, Alexandre  
523 Krainik, Alexander Hammers, Monica Baciú, Pascal Hot, Alzheimer’s disease Neuroimaging Initiative, et al.  
524 Amygdalar atrophy in early alzheimer’s disease. *Current Alzheimer Research*, 11(3):239–252, 2014.
- 525 [44] Heiko Braak and Eva Braak. Neuropathological staging of alzheimer-related changes. *Acta neuropathologica*,  
526 82(4):239–259, 1991.
- 527 [45] Clifford R Jack Jr, Heather J Wiste, Prashanthi Vemuri, Stephen D Weigand, Matthew L Senjem, Guang Zeng,  
528 Matt A Bernstein, Jeffrey L Gunter, Vernon S Pankratz, Paul S Aisen, et al. Brain beta-amyloid measures  
529 and magnetic resonance imaging atrophy both predict time-to-progression from mild cognitive impairment to  
530 alzheimer’s disease. *Brain*, 133(11):3336–3348, 2010.
- 531 [46] W. J. Henneman, J. D. Sluimer, J. Barnes, W. M. van der Flier, I. C. Sluimer, N. C. Fox, P. Scheltens, H. Vrenken,  
532 and F. Barkhof. Hippocampal atrophy rates in Alzheimer disease: added value over whole brain volume measures.  
533 *Neurology*, 72(11):999–1007, Mar 2009.
- 534 [47] Shannon L Risacher, Andrew J Saykin, John D Wes, Li Shen, Hiram A Firpi, and Brenna C McDonald. Baseline  
535 mri predictors of conversion from mci to probable ad in the adni cohort. *Current Alzheimer Research*, 6(4):  
536 347–361, 2009.
- 537 [48] Ben Glocker, Robert Robinson, Daniel C Castro, Qi Dou, and Ender Konukoglu. Machine learning with multi-site  
538 imaging data: An empirical study on the impact of scanner effects. *arXiv preprint arXiv:1910.04597*, 2019.
- 539 [49] Juha Koikkalainen, Hanneke Rhodius-Meester, Antti Tolonen, Frederik Barkhof, Betty Tijms, Afina W Lemstra,  
540 Tong Tong, Ricardo Guerrero, Andreas Schuh, Christian Ledig, et al. Differential diagnosis of neurodegenerative  
541 diseases using structural mri data. *NeuroImage: Clinical*, 11:435–449, 2016.
- 542 [50] Aoyan Dong, Nicolas Honnorat, Bilwaj Gaonkar, and Christos Davatzikos. Chimera: clustering of heterogeneous  
543 disease effects via distribution matching of imaging patterns. *IEEE transactions on medical imaging*, 35(2):  
544 612–621, 2015.
- 545 [51] Katja Franke and Christian Gaser. Longitudinal changes in individual brainage in healthy aging, mild cognitive  
546 impairment, and alzheimer’s disease 1 data used in preparation of this article were obtained from the alzheimer’s  
547 disease neuroimaging initiative (adni) database (adni. loni. ucla. edu). as such, the investigators within the adni  
548 contributed to the design and implementation of adni and/or provided data but did not participate in analysis  
549 or writing of this report. a complete listing of adni investigators can be found at: adni. loni. ucla. edu/wp-  
550 content/uploads/how\_to\_apply/adni\_acknowledgement\_list. pdf. *GeroPsych*, 2012.
